# Supplementary material for: Photoactive benzothiadiazole-N-heterocycle derivatives: synthesis, photophysics and water sensing in organic solvents
Source: Royal Society of Chemistry journal article supplement (doi:10.1039/d4nj00185k), 2024-01-01
Supplement: d4nj00185k1.pdf [file d4nj00185k1.pdf]

*Supporting Information*

**Photoactive benzothiadiazole-*N*-heterocycle derivatives. Synthesis, photophysics and water sensing in organic solvents**

Camila P. Ebersol,<sup>a</sup> Natali P. Debia,<sup>a</sup> Hamilton C. Zimba,<sup>a</sup> Emmanuel S. Moraes,<sup>b</sup> Diogo S. Lüdtké,<sup>a</sup> Fabiano S. Rodembusch<sup>a</sup> and Angélica V. Moro<sup>\*a</sup>

angelica.venturini@ufrgs.br

<sup>a</sup>Institute of Chemistry, Universidade Federal do Rio Grande do Sul, Av. Bento Gonçalves 9500, 91501-970, Porto Alegre, RS, Brazil.

<sup>b</sup>Chemistry Institute, University of Campinas, Campinas 13083-970, Brazil.

**TABLE OF CONTENTS**

|                                                                      |    |
|----------------------------------------------------------------------|----|
| 1. General Information .....                                         | 01 |
| 2. General Procedure for the synthesis of compounds <b>1-3</b> ..... | 01 |
| 3. Procedure for the synthesis of compound <b>4</b> .....            | 02 |
| 4. Procedure for the synthesis of compound <b>5</b> .....            | 03 |
| 5. NMR Characterization .....                                        | 04 |
| 6. Photophysical Characterization .....                              | 10 |
| 7. Theoretical Calculations .....                                    | 30 |

## 1. General Information

NMR spectra were recorded in CDCl<sub>3</sub> solution on a Varian VNMRJ 400 MHz spectrometer at room temperature. Chemical shifts ( $\delta$ ) are given in parts per million from the peak of tetramethylsilane ( $\delta = 0.00$  ppm) as an internal standard in <sup>1</sup>H NMR or from the solvent peak of CDCl<sub>3</sub> ( $\delta = 77.00$  ppm) in <sup>13</sup>C NMR. ESI-QTOF-MS measurements were performed in the positive ion mode (*m/z* 50-2000 range). IR spectra were obtained on an FTIR-ATR instrument. Spectroscopic grade solvents were used in the photophysical study. The UV-Vis absorption spectra in solution were acquired on a Shimadzu UV-2450 spectrophotometer, and the steady-state fluorescence spectra were measured on a Shimadzu spectrofluorometer model RF-5301PC. Flash chromatography was performed using silica gel (230-400 mesh). Thin layer chromatography (TLC) was performed using supported silica gel GF254, 0.25 mm thickness. For visualization, TLC plates were either placed under UV light 254 nm or stained with iodine vapor. CuO, CuI, pyrazoles, indole, and phenothiazine were purchased from commercial suppliers and used as received. Pd(PPh<sub>3</sub>)<sub>4</sub><sup>1</sup> and 4,7-dibromobenzo[c]-1,2,5-thiadiazole<sup>2</sup> were prepared according to procedures described in the literature.

## 2. General Procedure for the synthesis of compounds 1-3

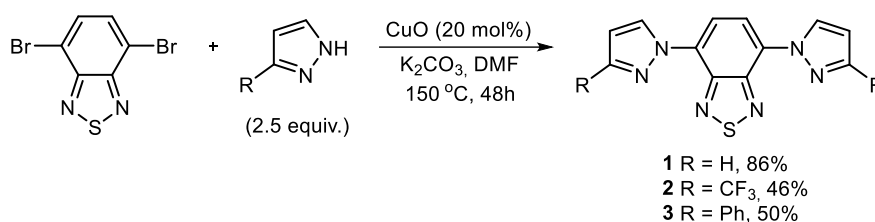

A Schlenk tube was charged with 4,7-dibromobenzo[c]-1,2,5-thiadiazole (0.2 mmol), indole (0.5 mmol), CuO (0.04 mmol), K<sub>2</sub>CO<sub>3</sub> (0.8 mmol), and DMF (2 mL), evacuated and backfilled with argon. The reaction mixture was stirred at 150 °C for 48h. The cooled reaction mixture was extracted with dichloromethane and water. The organic layer was dried over MgSO<sub>4</sub>, and concentrated in vacuo. The residue was purified by column chromatography on silica gel using hexane and ethyl acetate, to provide the desired product.

<sup>1</sup>. Barbiéri, R. S. *Quim. Nova* **1991**, *14*, 212.

<sup>2</sup> Pilgram, K.; Zupan, M.; Skiles, R. *J. Heterocycl. Chem.* **1970**, *7*, 629.

**Compound 1:** 4,7-di(1H-pyrazol-1-yl)benzo[c][1,2,5]thiadiazole

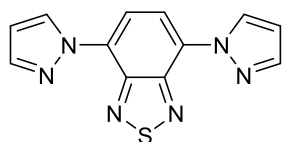

Yellow solid. **Yield:** 46 mg, 86%. **<sup>1</sup>H NMR** (400 MHz, CDCl<sub>3</sub>) δ 9.08 (d, *J* = 2.5 Hz, 2H), 8.34 (s, 2H), 7.84 (d, *J* = 1.5 Hz, 2H), 6.60 (dd, *J* = 2.5, 1.5 Hz, 2H). **<sup>13</sup>C NMR** (100 MHz, CDCl<sub>3</sub>) δ 147.7, 141.6, 131.3, 129.3, 119.4, 107.9. **IR** (ν<sub>max</sub>, cm<sup>-1</sup>): 2958, 2853, 1726, 1496, 749. **HRMS** (ESI<sup>+</sup>): The exact mass calculated for [M+H]<sup>+</sup> (C<sub>12</sub>H<sub>9</sub>N<sub>6</sub>S) requires *m/z* 269.0609, found: *m/z* 269.0604.

**Compound 2:** 4,7-bis(3-(trifluoromethyl)-1H-pyrazol-1-yl)benzo[c][1,2,5]thiadiazole

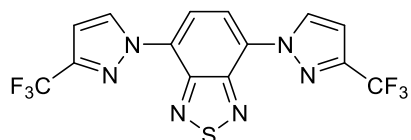

Green solid. **Yield:** 37 mg, 46%. **<sup>1</sup>H NMR** (400 MHz, CDCl<sub>3</sub>) δ 9.11 (dd, *J* = 2.5, 0.9 Hz, 2H), 7.19 (s, 2H), 6.78 (d, *J* = 2.5 Hz, 2H). **<sup>13</sup>C NMR** (100 MHz, CDCl<sub>3</sub>) δ 147.4, 144.6 (q, *J* = 38.7 Hz), 133.0, 129.2, 121.1 (q, *J* = 267.0 Hz), 120.3, 106.3 (q, *J* = 2.0 Hz). **IR** (ν<sub>max</sub>, cm<sup>-1</sup>): 2926, 2850, 1544, 1397, 1270, 1121, 760. **HRMS** (ESI<sup>+</sup>): The exact mass calculated for [M+H]<sup>+</sup> (C<sub>14</sub>H<sub>7</sub>F<sub>6</sub>N<sub>6</sub>S) requires *m/z* 405.0357, found: *m/z* 405.0352.

**Compound 3:** 4,7-bis(3-phenyl-1H-pyrazol-1-yl)benzo[c][1,2,5]thiadiazole

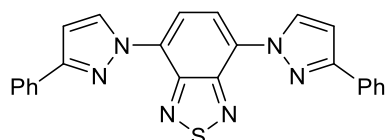

Orange solid. **Yield:** 42 mg, 50%. **<sup>1</sup>H NMR** (400 MHz, CDCl<sub>3</sub>) δ 9.20 (d, *J* = 2.6 Hz, 2H), 8.51 (s, 2H), 8.02-7.98 (m, 4H), 7.51-7.45 (m, 4H), 7.41-7.36 (m, 2H), 6.91 (d, *J* = 2.6 Hz, 2H). **<sup>13</sup>C NMR** (100 MHz, CDCl<sub>3</sub>) δ 153.2, 147.6, 132.8, 132.7, 129.0, 128.8, 128.5, 126.1, 119.2, 105.6. **IR** (ν<sub>max</sub>, cm<sup>-1</sup>): 2926, 2853, 1731, 1455, 738. **HRMS** (ESI<sup>+</sup>): The exact mass calculated for [M+H]<sup>+</sup> (C<sub>24</sub>H<sub>17</sub>N<sub>2</sub>S) requires *m/z* 421.1235, found: *m/z* 421.1230.

**3. Procedure for the synthesis of compound 4**

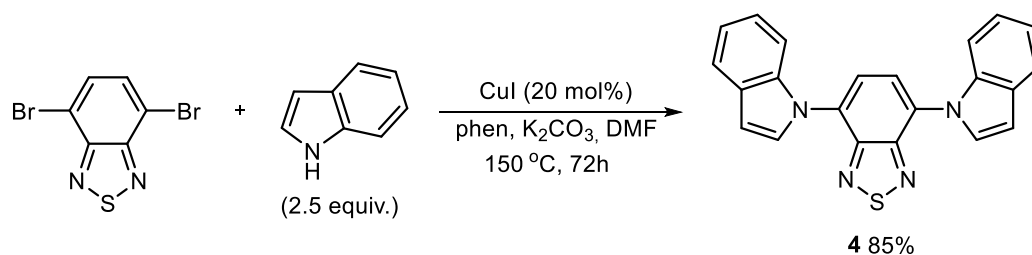

A Schlenk tube was charged with 4,7-dibromobenzo[c]-1,2,5-thiadiazole (0.2 mmol), indole (0.5 mmol), CuI (0.04 mmol), 1,10-phenanthroline (0.04 mmol), K<sub>2</sub>CO<sub>3</sub> (0.8 mmol), and DMF (2 mL), evacuated and backfilled with argon. The reaction mixture was stirred at 150 °C for 72h. The cooled reaction mixture was extracted with dichloromethane and water. The organic layer was dried over MgSO<sub>4</sub>, and concentrated in vacuo. The residue was purified by column chromatography on silica gel using hexane and ethyl acetate, to provide the desired product.

**Compound 4:** 4,7-di(1H-indol-1-yl)benzo[c][1,2,5]thiadiazole

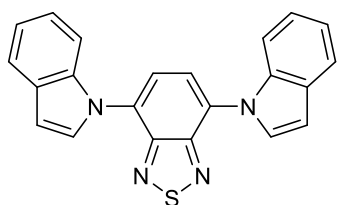

Orange solid. **Yield:** 62 mg, 85%. **<sup>1</sup>H NMR** (400 MHz, CDCl<sub>3</sub>) δ 7.82 (s, 2H), 7.73 (d, *J* = 3.3 Hz, 2H), 7.68 (dd, *J* = 7.1, 1.2 Hz, 2H), 7.51 (d, *J* = 8.1 Hz, 2H), 7.23-7.15 (m, 4H), 6.78 (d, *J* = 3.3 Hz, 2H). **<sup>13</sup>C NMR** (100 MHz, CDCl<sub>3</sub>) δ 151.6, 136.3, 129.8, 129.5, 129.1, 123.2, 122.7, 121.4, 121.2, 110.7, 104.8. **IR** (ν<sub>max</sub>, cm<sup>-1</sup>): 2905, 2857, 1503, 1435, 748. **HRMS** (ESI<sup>+</sup>): The exact mass calculated for [M+H]<sup>+</sup> (C<sub>22</sub>H<sub>15</sub>N<sub>4</sub>S) requires *m/z* 367.1017, found: *m/z* 367.1012.

#### 4. Procedure for the synthesis of compound 5

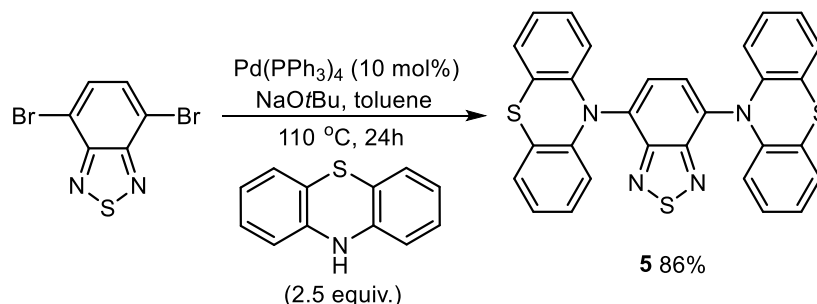

A Schlenk tube was charged with 4,7-dibromobenzo[*c*]-1,2,5-thiadiazole (0.2 mmol), phenothiazine (0.5 mmol), Pd(PPh<sub>3</sub>)<sub>4</sub> (0.02 mmol), NaOtBu (0.44 mmol), and toluene (1.5 mL), evacuated and backfilled with argon. The reaction mixture was stirred at 110 °C for 24h. The cooled reaction mixture was extracted with dichloromethane and water. The organic layer was dried over MgSO<sub>4</sub>, and concentrated in vacuo. The residue was purified by column chromatography on silica gel using hexane and ethyl acetate, to provide the desired product.

#### Compound 5: 4,7-di(10H-phenothiazin-10-yl)benzo[*c*][1,2,5]thiadiazole

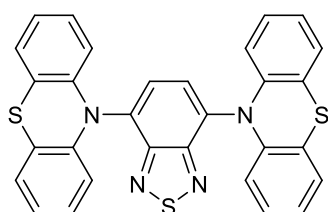

Brown solid. **Yield:** 91 mg, 86%. **<sup>1</sup>H NMR** (400 MHz, CDCl<sub>3</sub>) δ 8.00 (s, 2H), 7.18-7.13 (m, 4H), 6.95-6.87 (m, 8H), 6.27-6.21 (m, 4H). **<sup>13</sup>C NMR** (100 MHz, CDCl<sub>3</sub>) δ 154.5, 143.4, 134.2, 132.7, 127.2, 127.0, 123.4, 121.8, 116.3. **IR** (ν<sub>max</sub>, cm<sup>-1</sup>): 2910, 2851, 1726, 1461, 1041, 723. **HRMS** (ESI<sup>+</sup>): The exact mass calculated for [M+H]<sup>+</sup> (C<sub>30</sub>H<sub>19</sub>N<sub>4</sub>S<sub>3</sub>) requires *m/z* 531.0772, found: *m/z* 531.0766.

---

# **NMR Characterization**

---

---

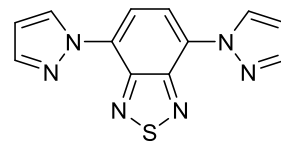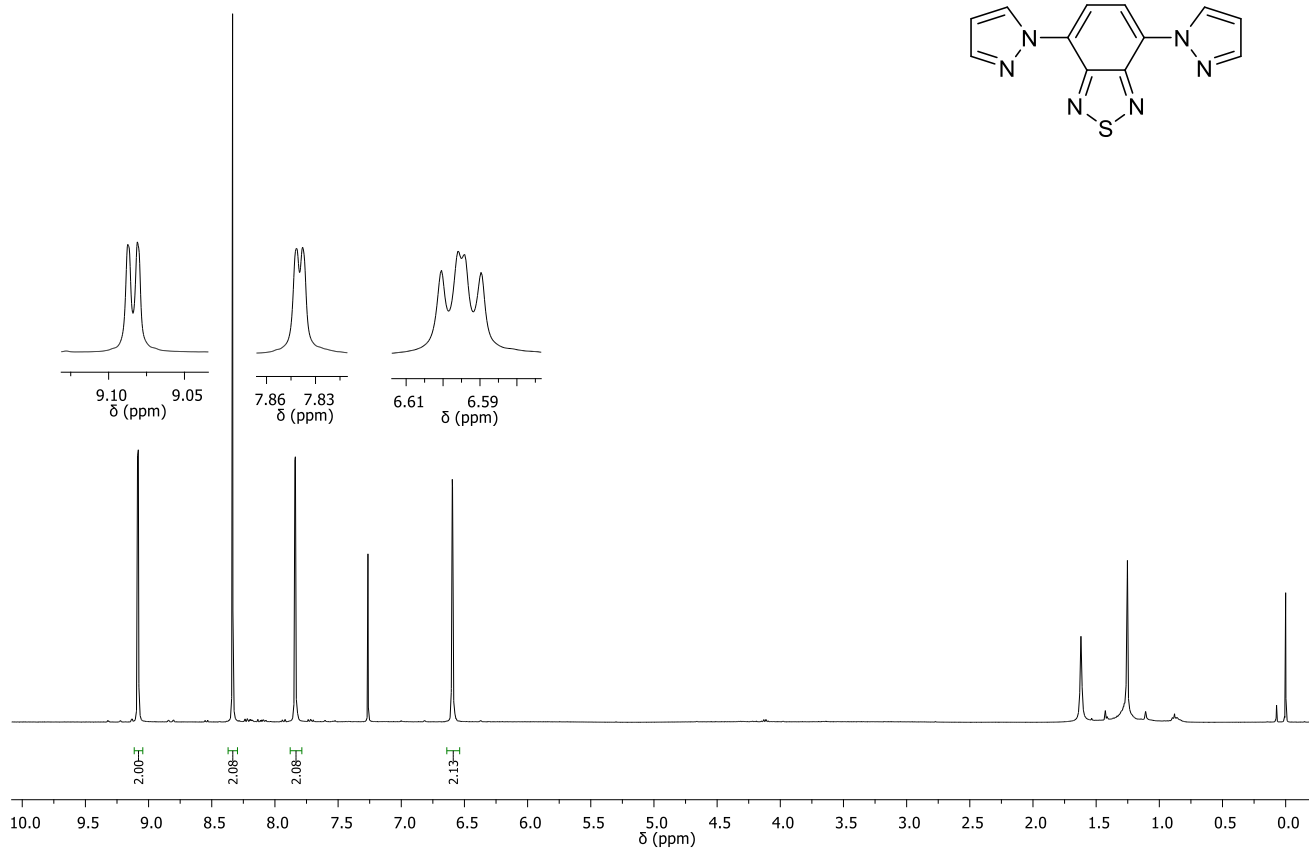

$^1\text{H}$  NMR spectrum for compound 1 in  $\text{CDCl}_3$ , 400 MHz

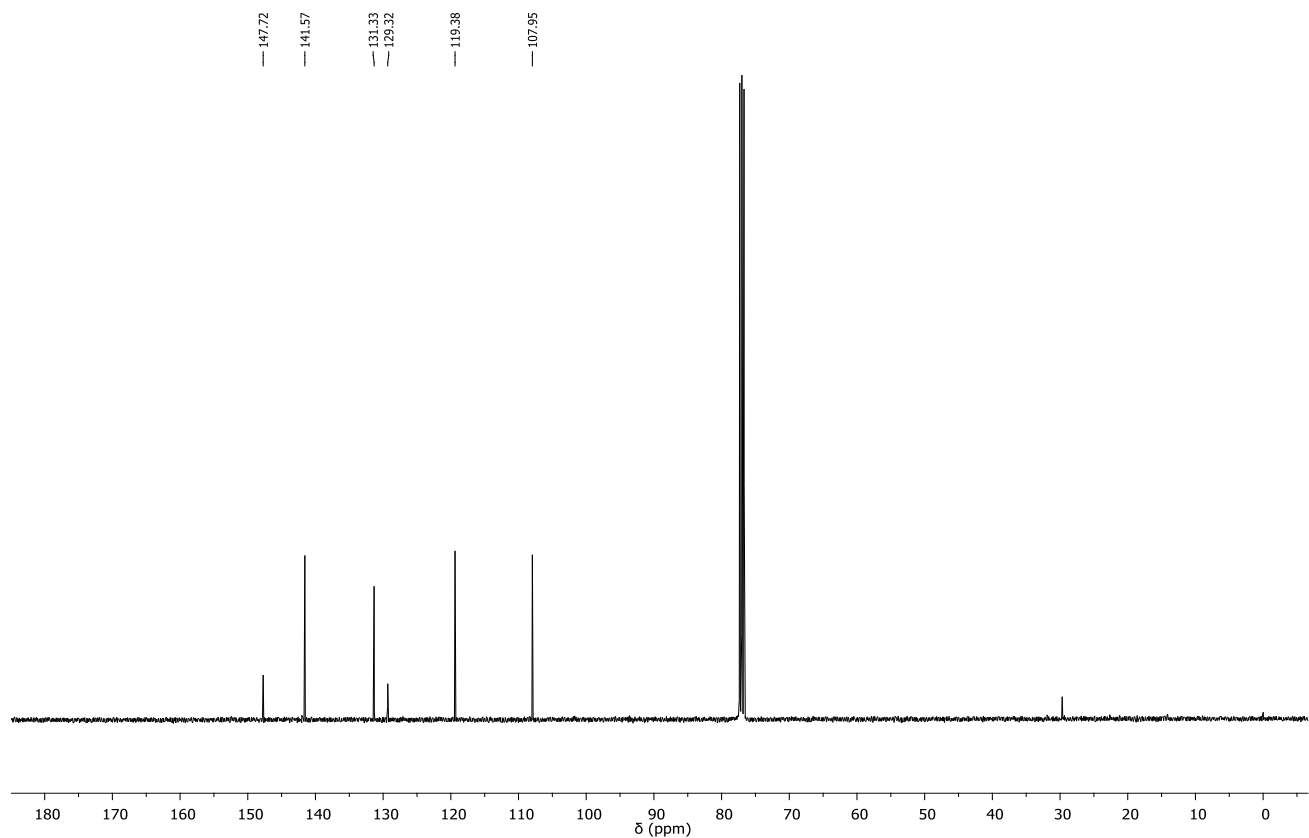

$^{13}\text{C}$  NMR spectrum for compound 1 in  $\text{CDCl}_3$ , 100 MHz

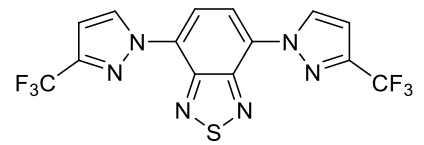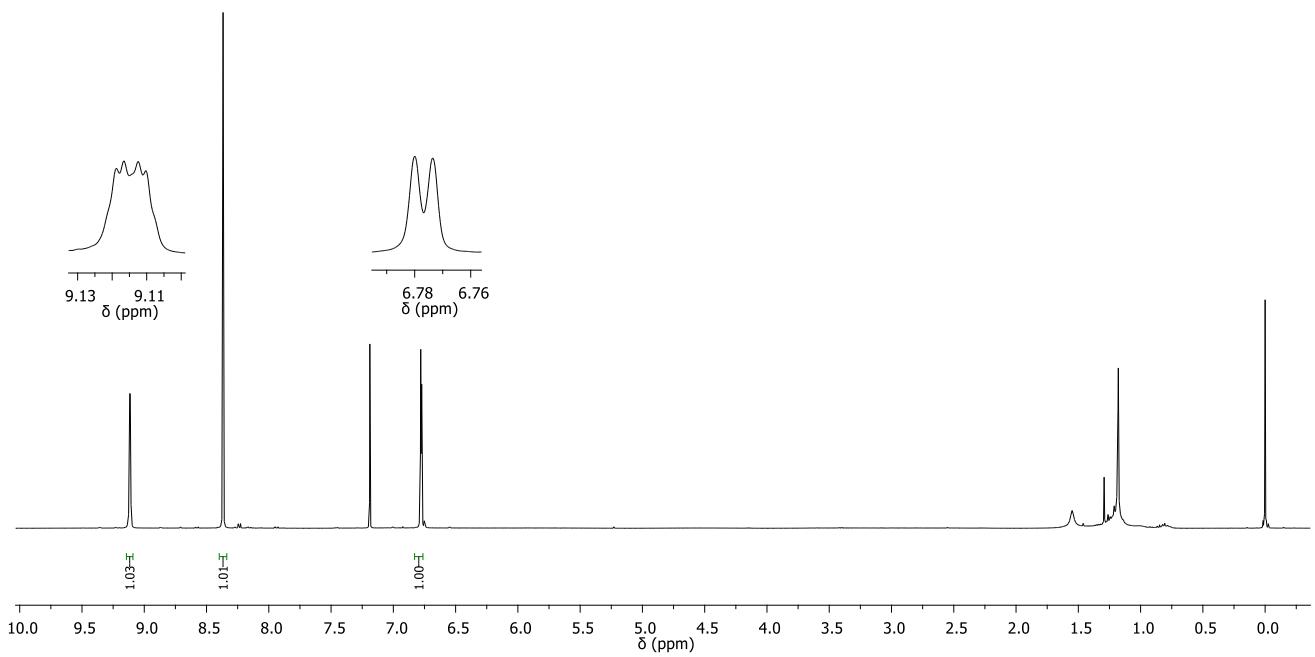

$^1\text{H}$  NMR spectrum for compound 2 in  $\text{CDCl}_3$ , 400 MHz

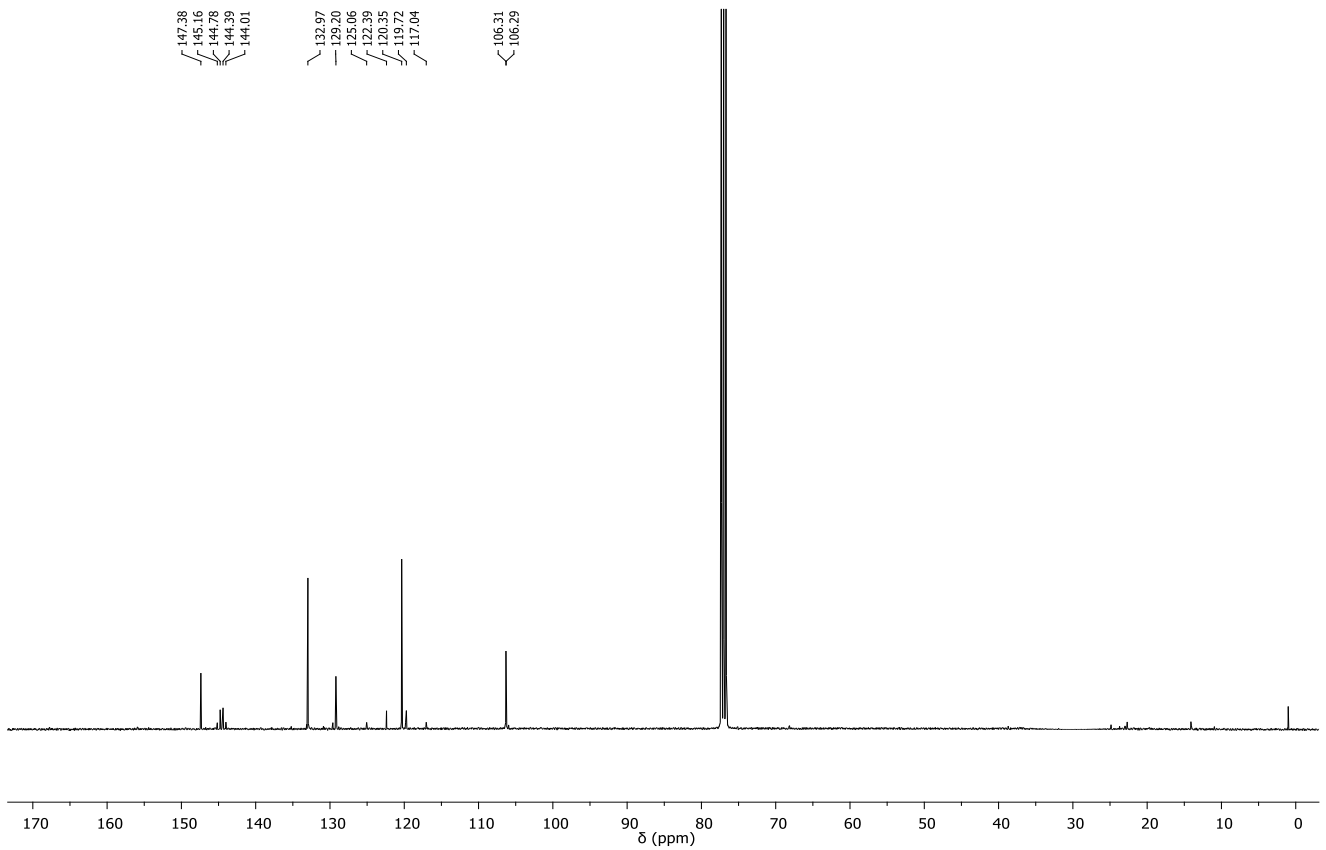

$^{13}\text{C}$  NMR spectrum for compound 2 in  $\text{CDCl}_3$ , 100 MHz

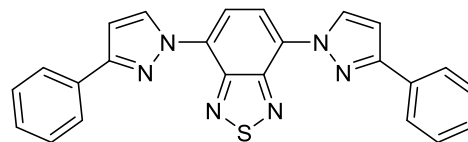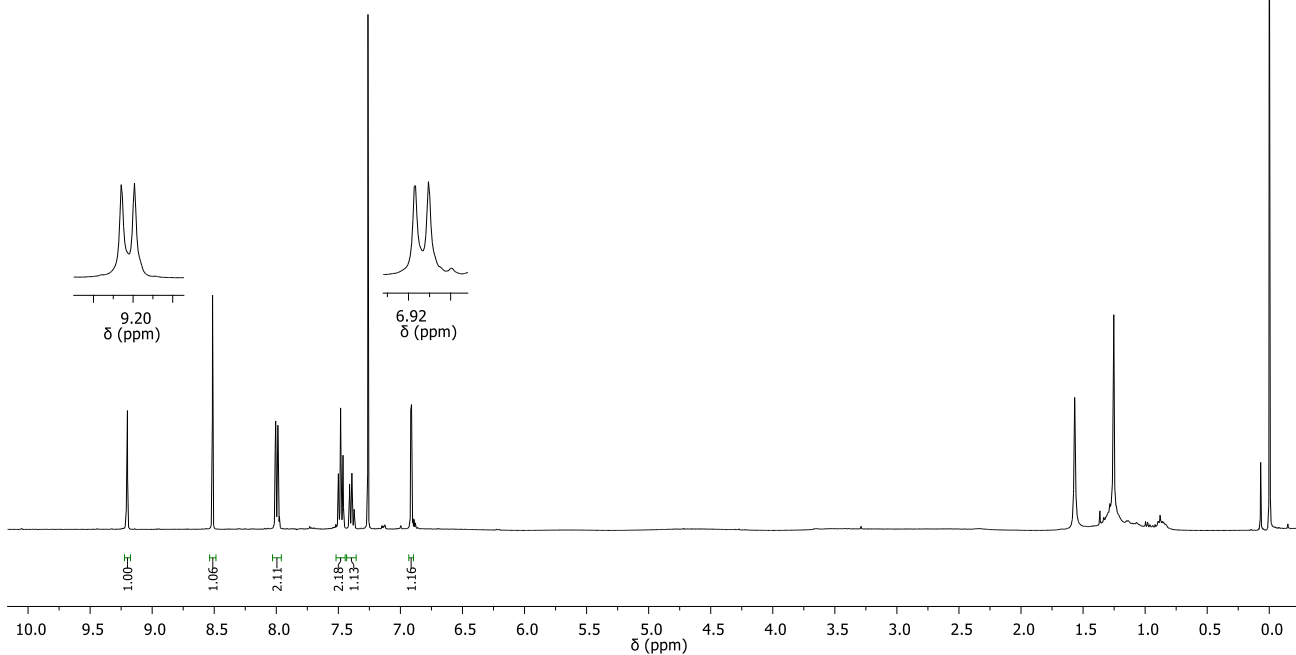

$^1\text{H}$  NMR spectrum for compound **3** in  $\text{CDCl}_3$ , 400 MHz

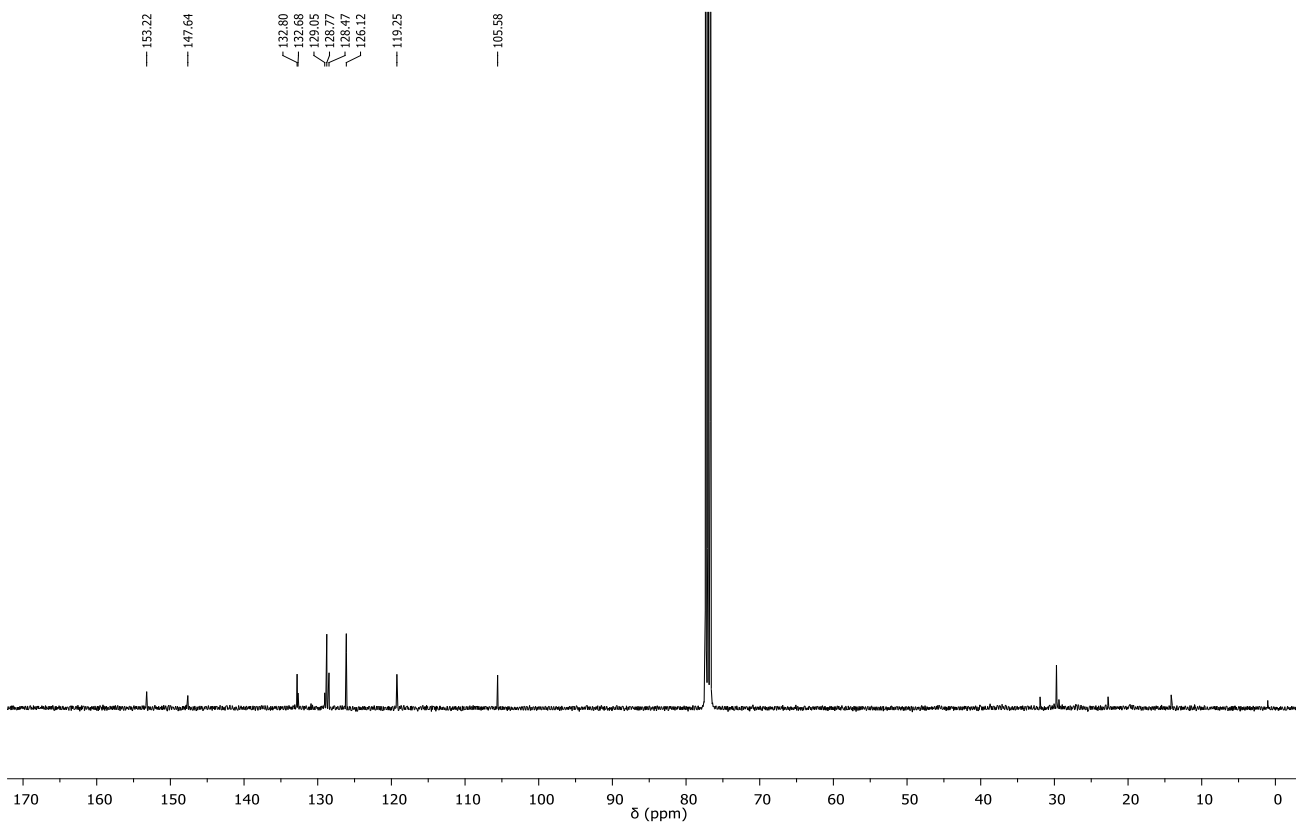

$^{13}\text{C}$  NMR spectrum for compound **3** in  $\text{CDCl}_3$ , 100 MHz



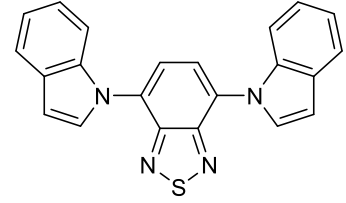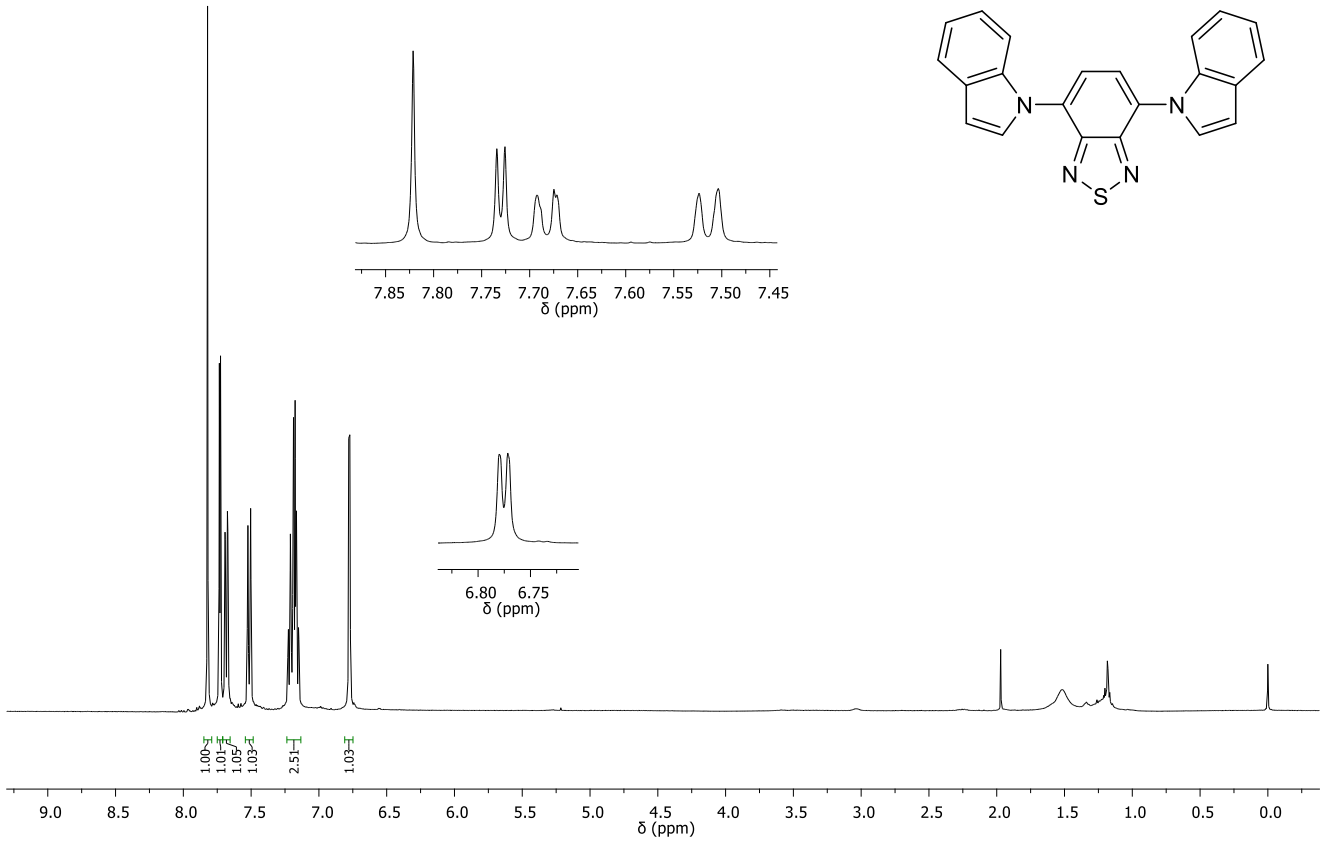

$^1\text{H}$  NMR spectrum for compound **4** in  $\text{CDCl}_3$ , 400 MHz

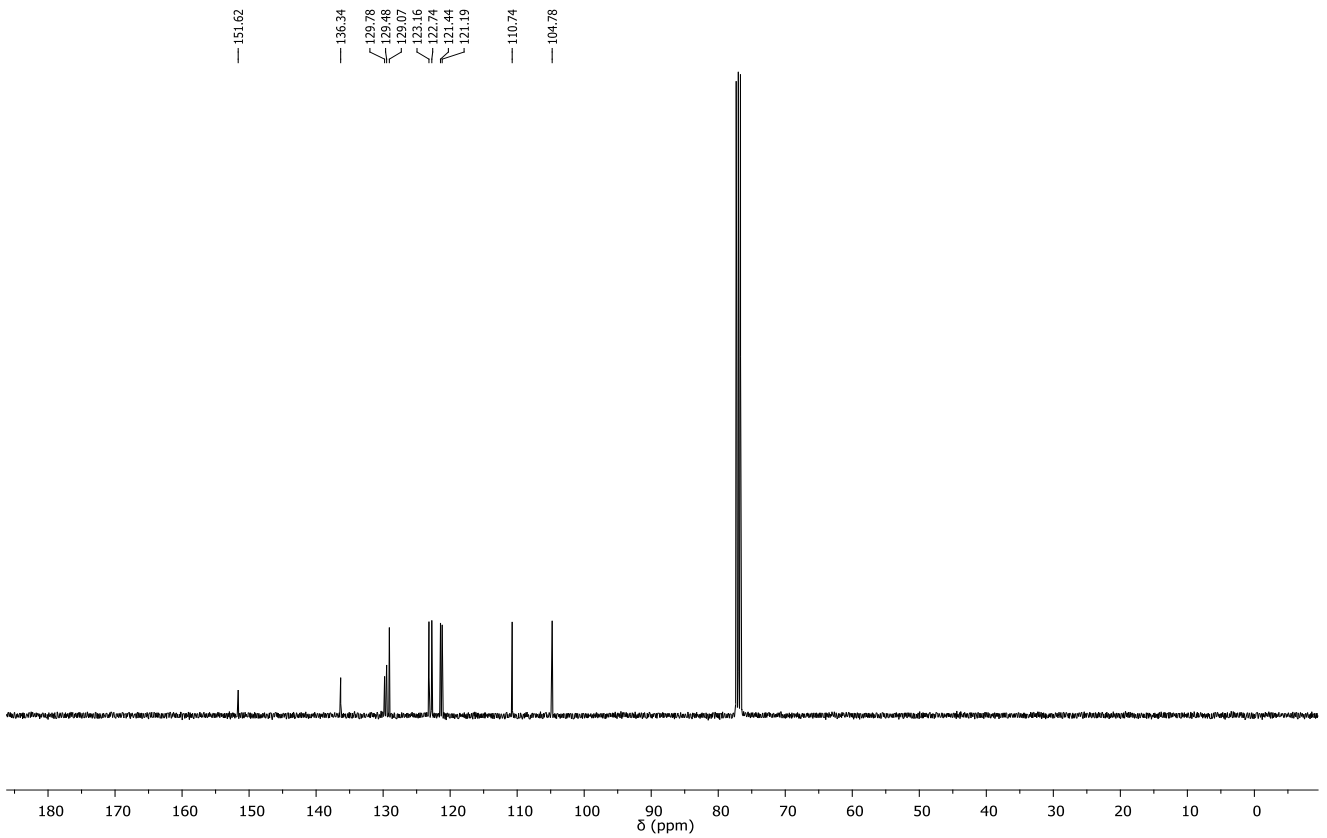

$^{13}\text{C}$  NMR spectrum for compound **4** in  $\text{CDCl}_3$ , 100 MHz

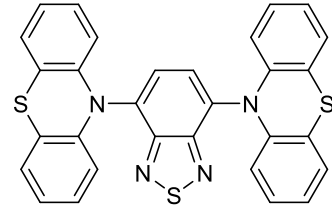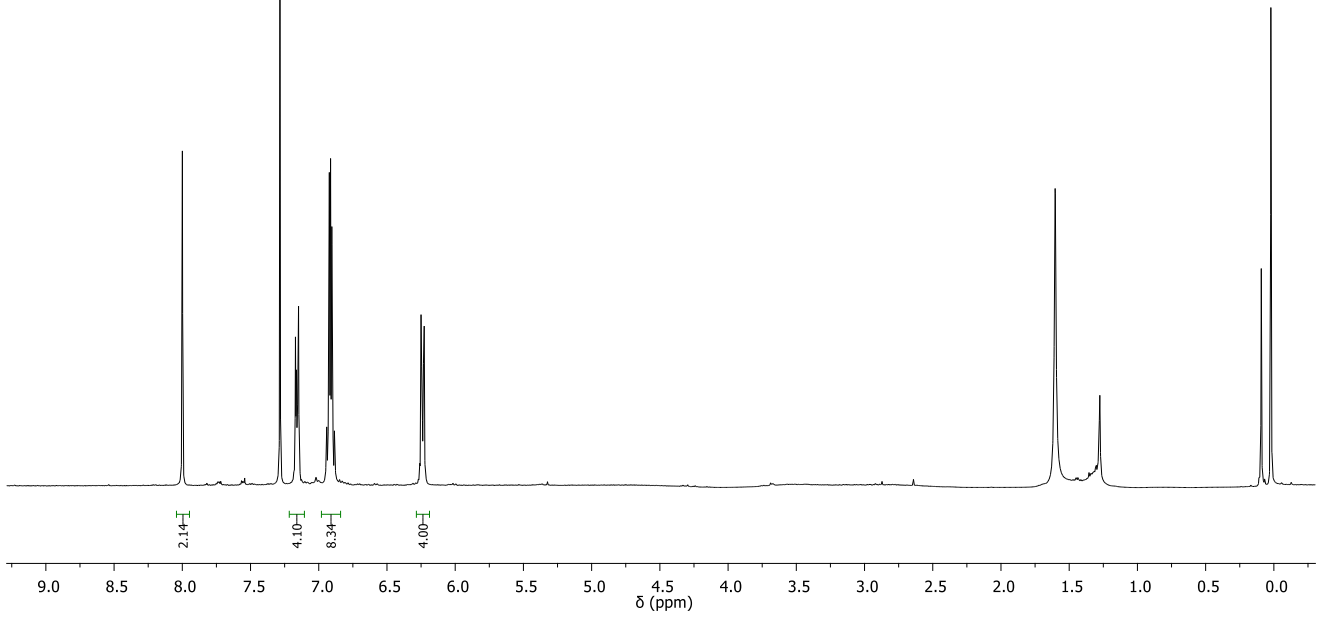

<sup>1</sup>H NMR spectrum for compound **5** in CDCl<sub>3</sub>, 400 MHz

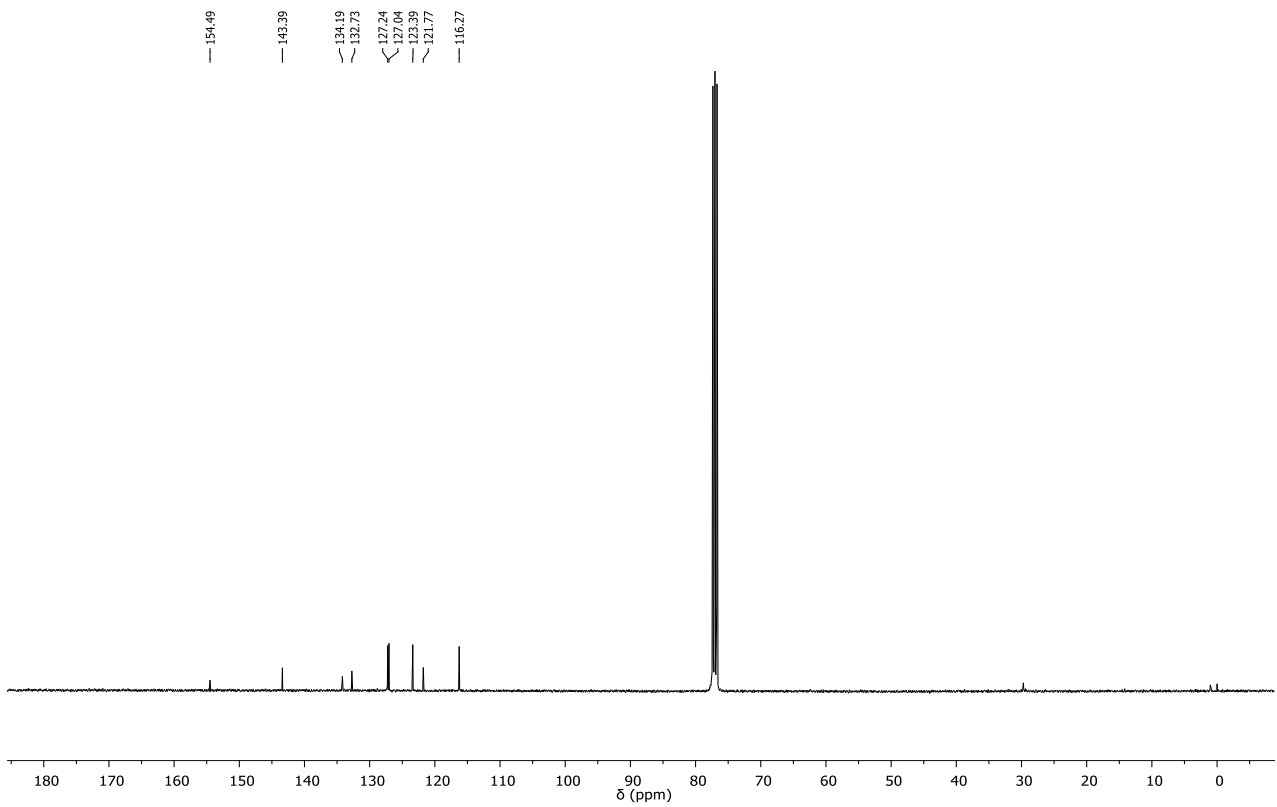

<sup>13</sup>C NMR spectrum for compound **5** in CDCl<sub>3</sub>, 100 MHz

---

# **Photophysical Characterization**

---

---

## Absorption, emission and excitation spectra

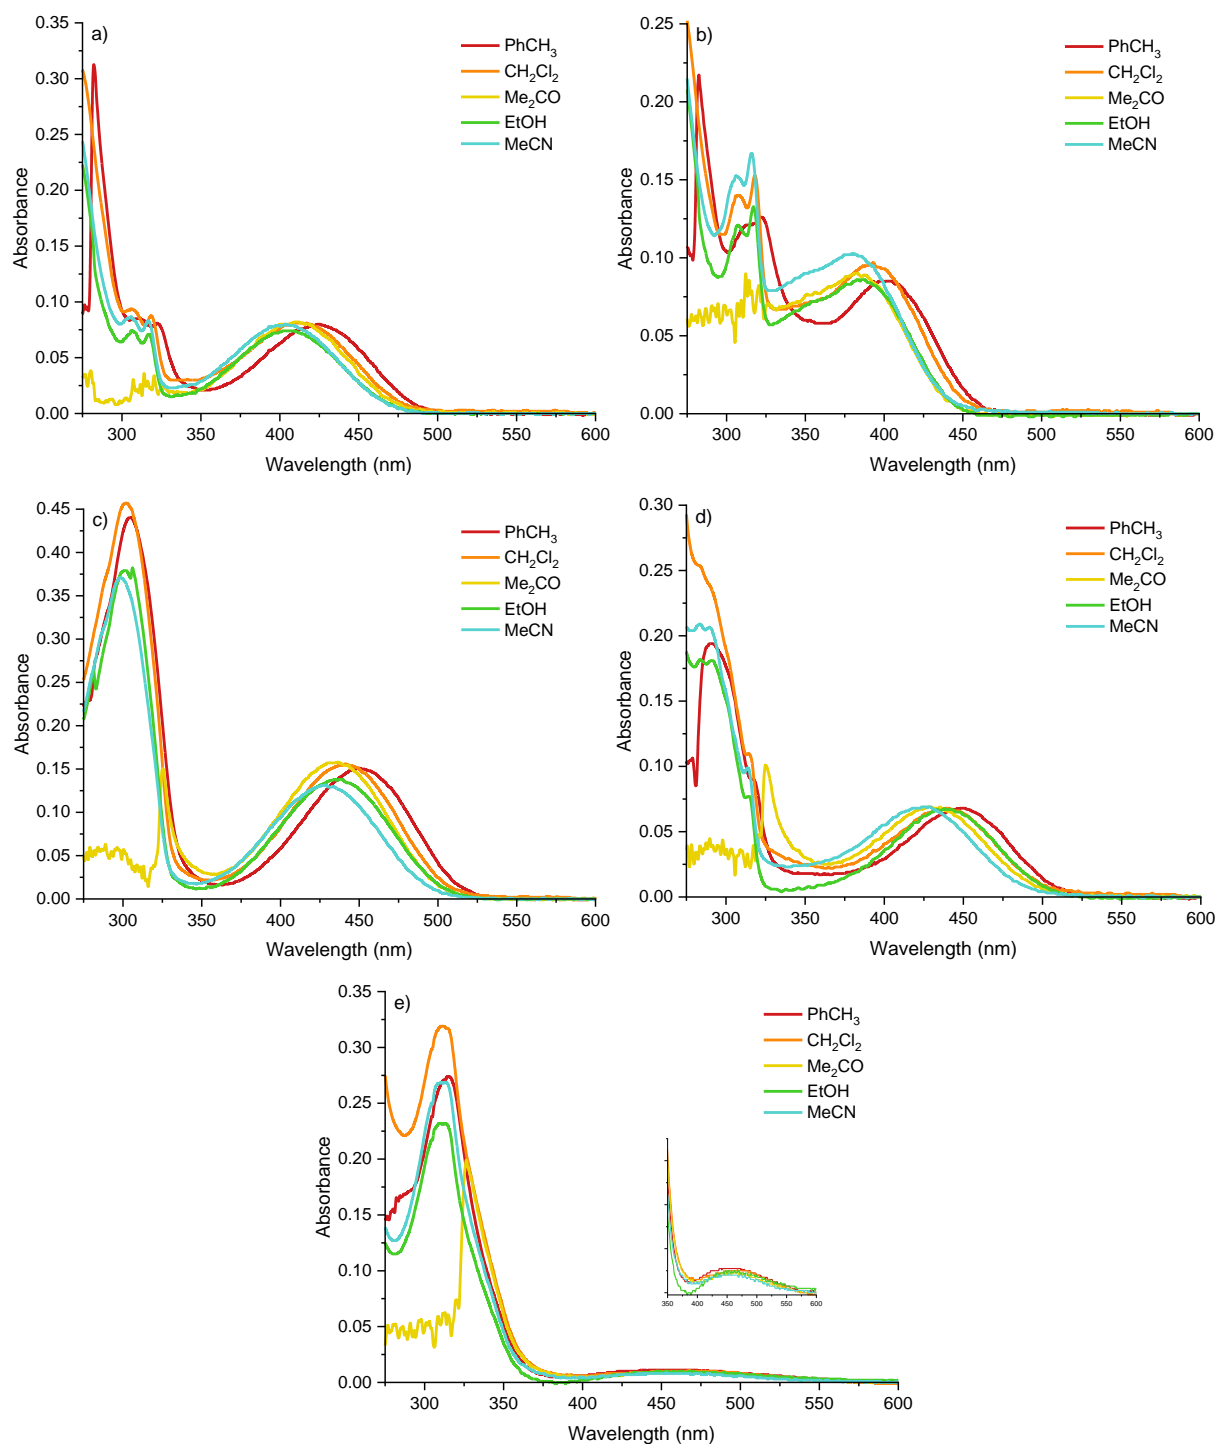

**Figure S1.** UV-Vis absorption spectra in solution of compounds a) **1**, b) **2**, c) **3**, d) **4**, and e) **5** in different organic solvents (ca  $10^{-5}$  M).

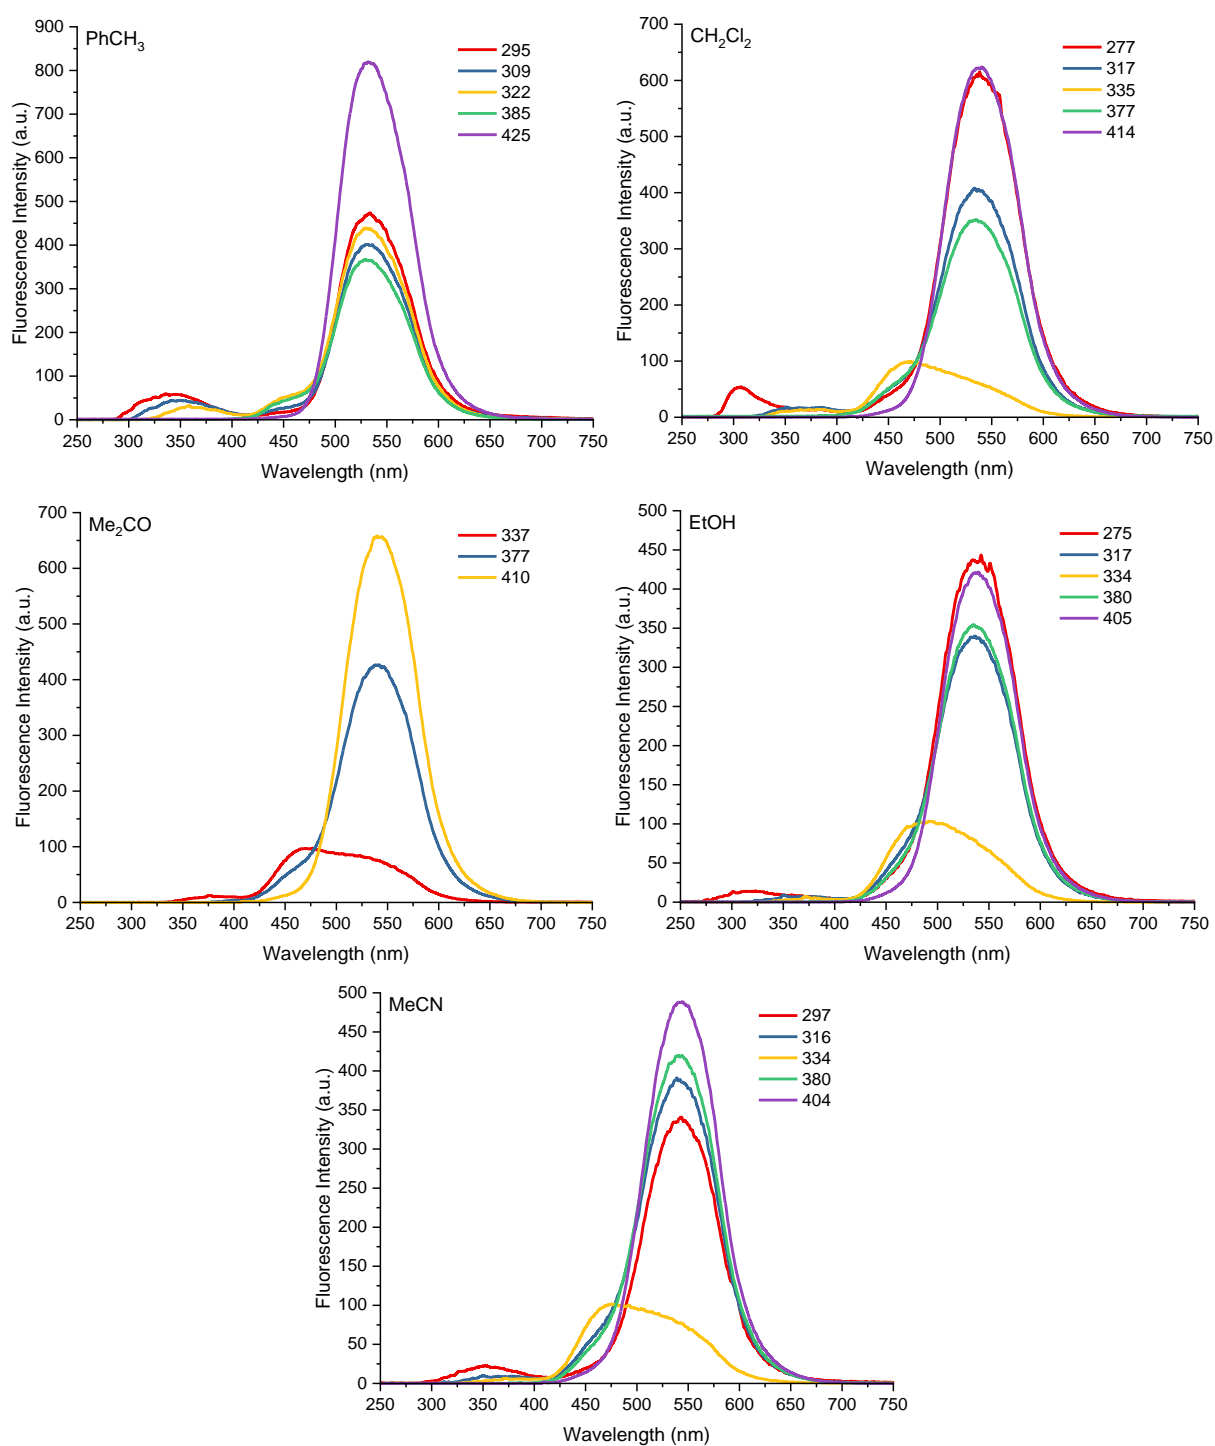

**Figure S2.** Steady-state fluorescence emission spectra of compound **1** in different organic solvents ( $ca\ 10^{-5}\ M$ , excitation/emission slits: 3.0/3.0 nm) at different excitation wavelengths (nm).

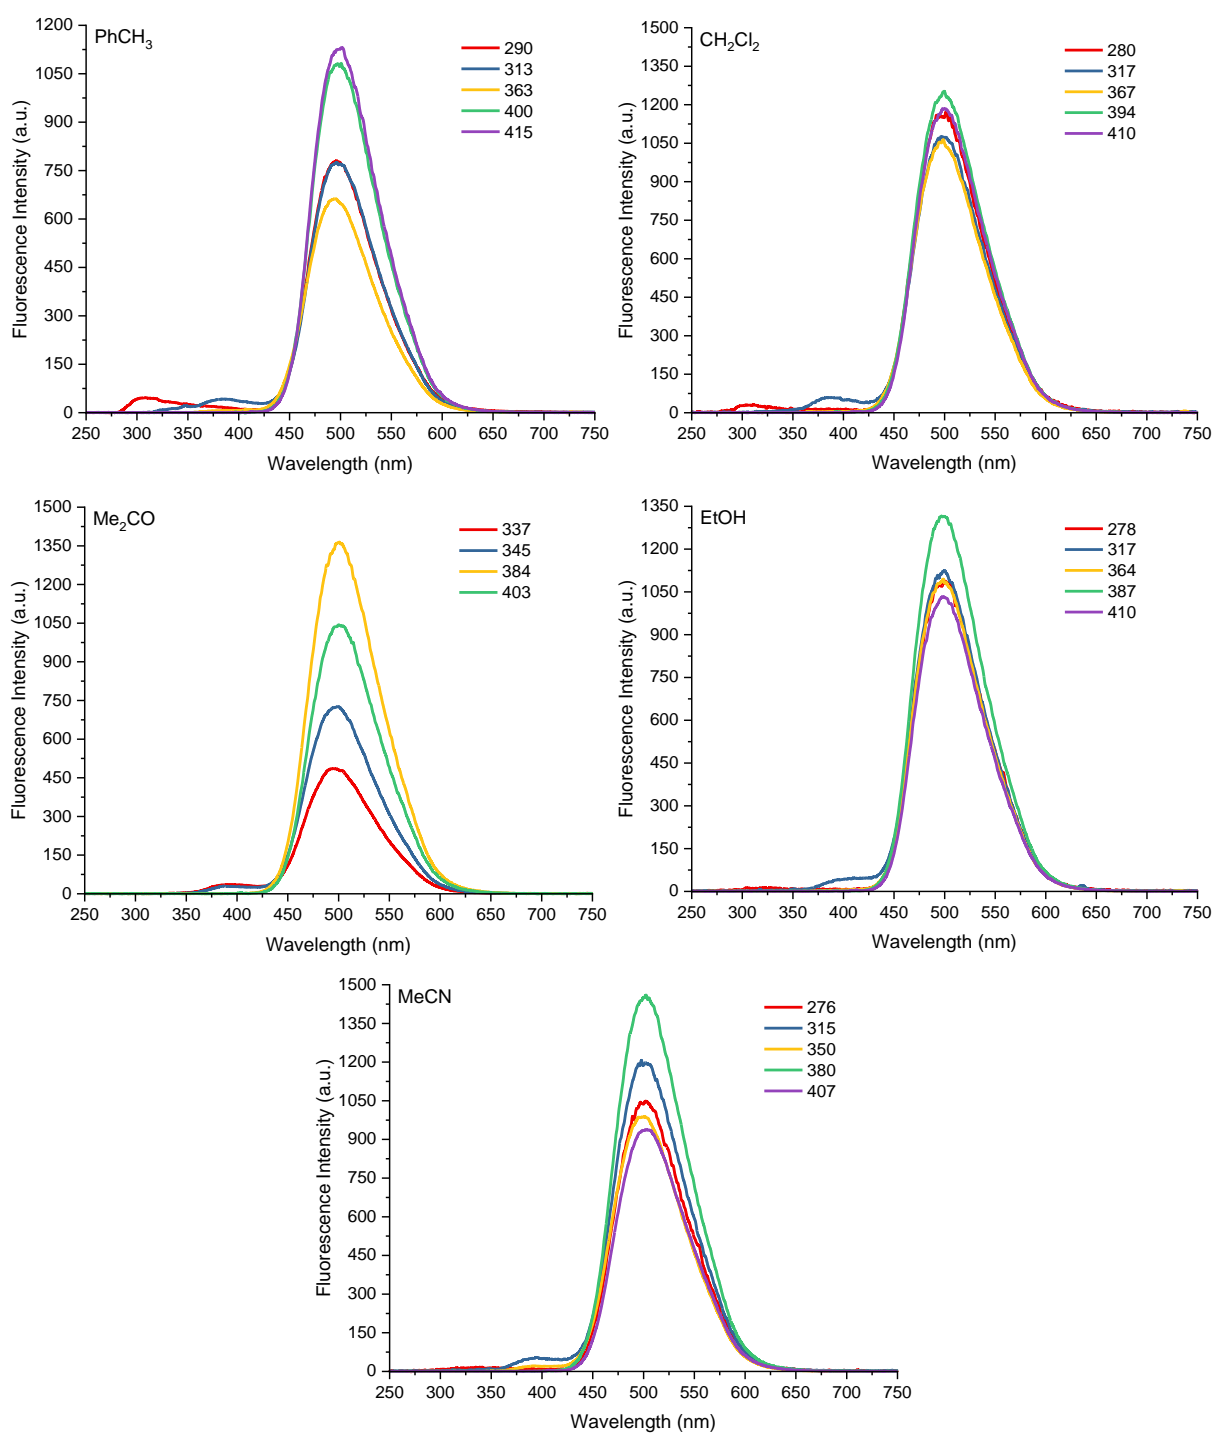

**Figure S3.** Steady-state fluorescence emission spectra of compound **2** in different organic solvents ( $ca\ 10^{-5}\ M$ , excitation/emission slits: 3.0/3.0 nm) at different excitation wavelengths (nm).

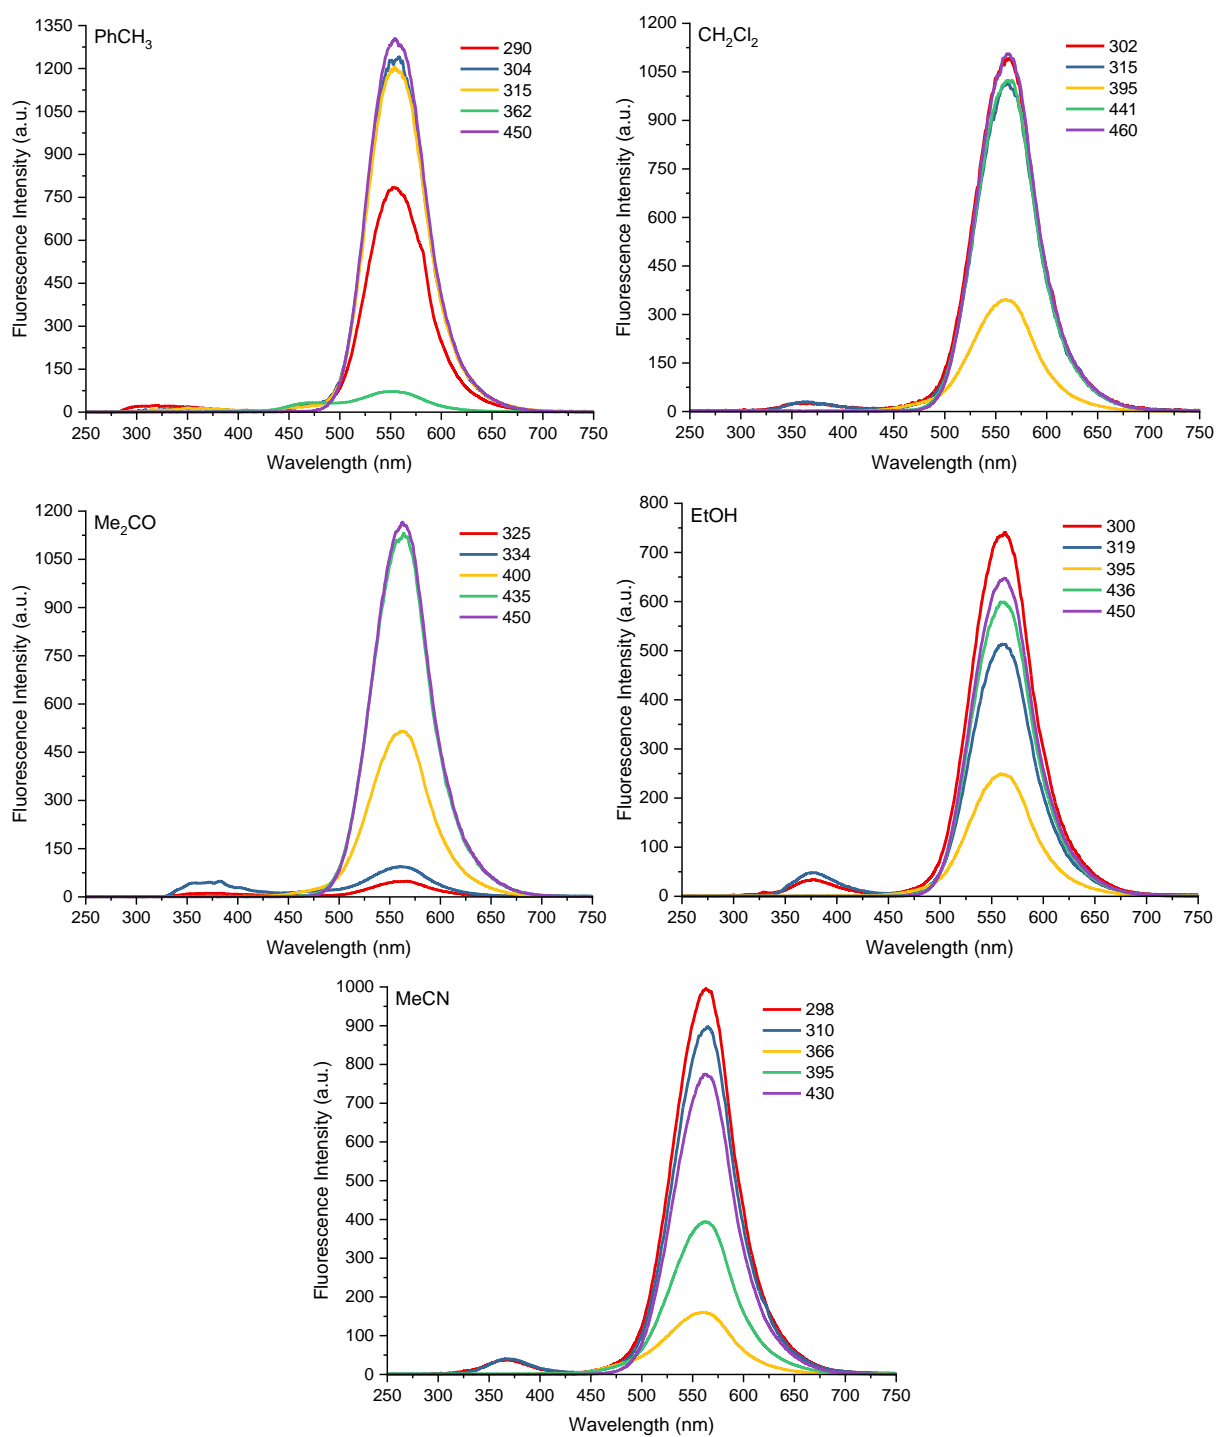

**Figure S4.** Steady-state fluorescence emission spectra of compound **3** in different organic solvents ( $ca\ 10^{-5}\ M$ , excitation/emission slits: 3.0/3.0 nm) at different excitation wavelengths (nm).

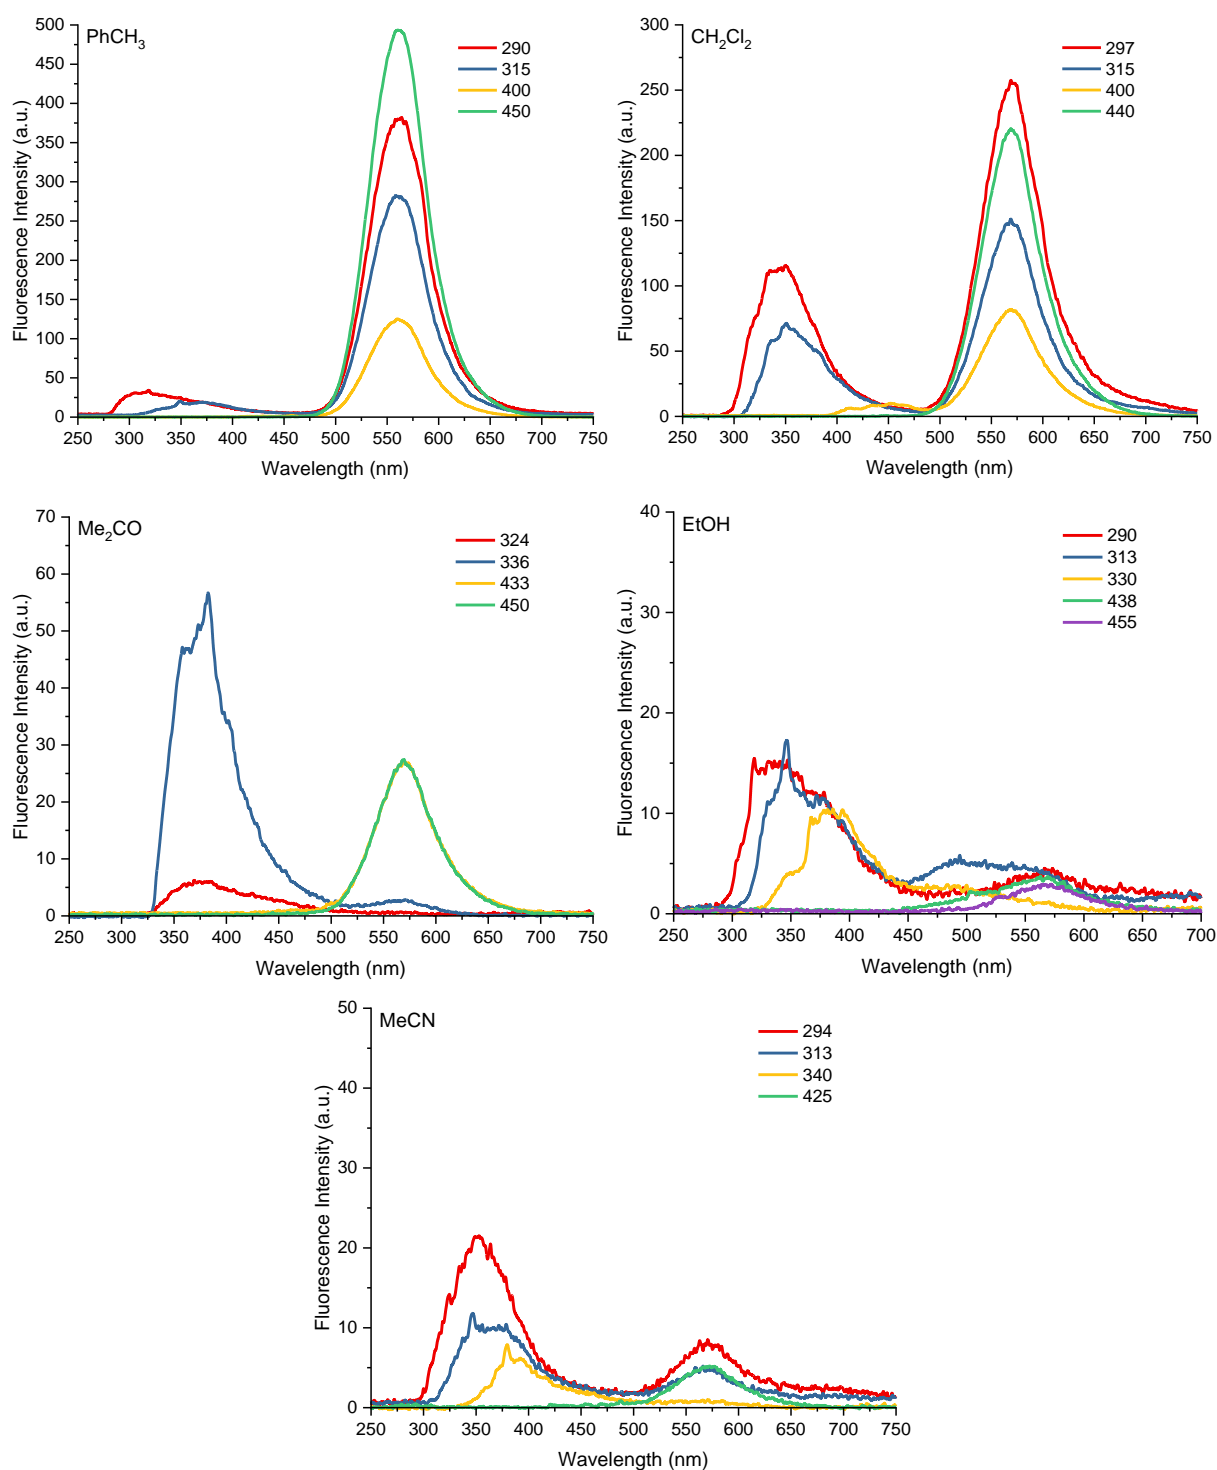

**Figure S5.** Steady-state fluorescence emission spectra of compound **4** in different organic solvents (ca  $10^{-5}$  M, excitation/emission slits: 3.0/3.0 nm) at different excitation wavelengths (nm).



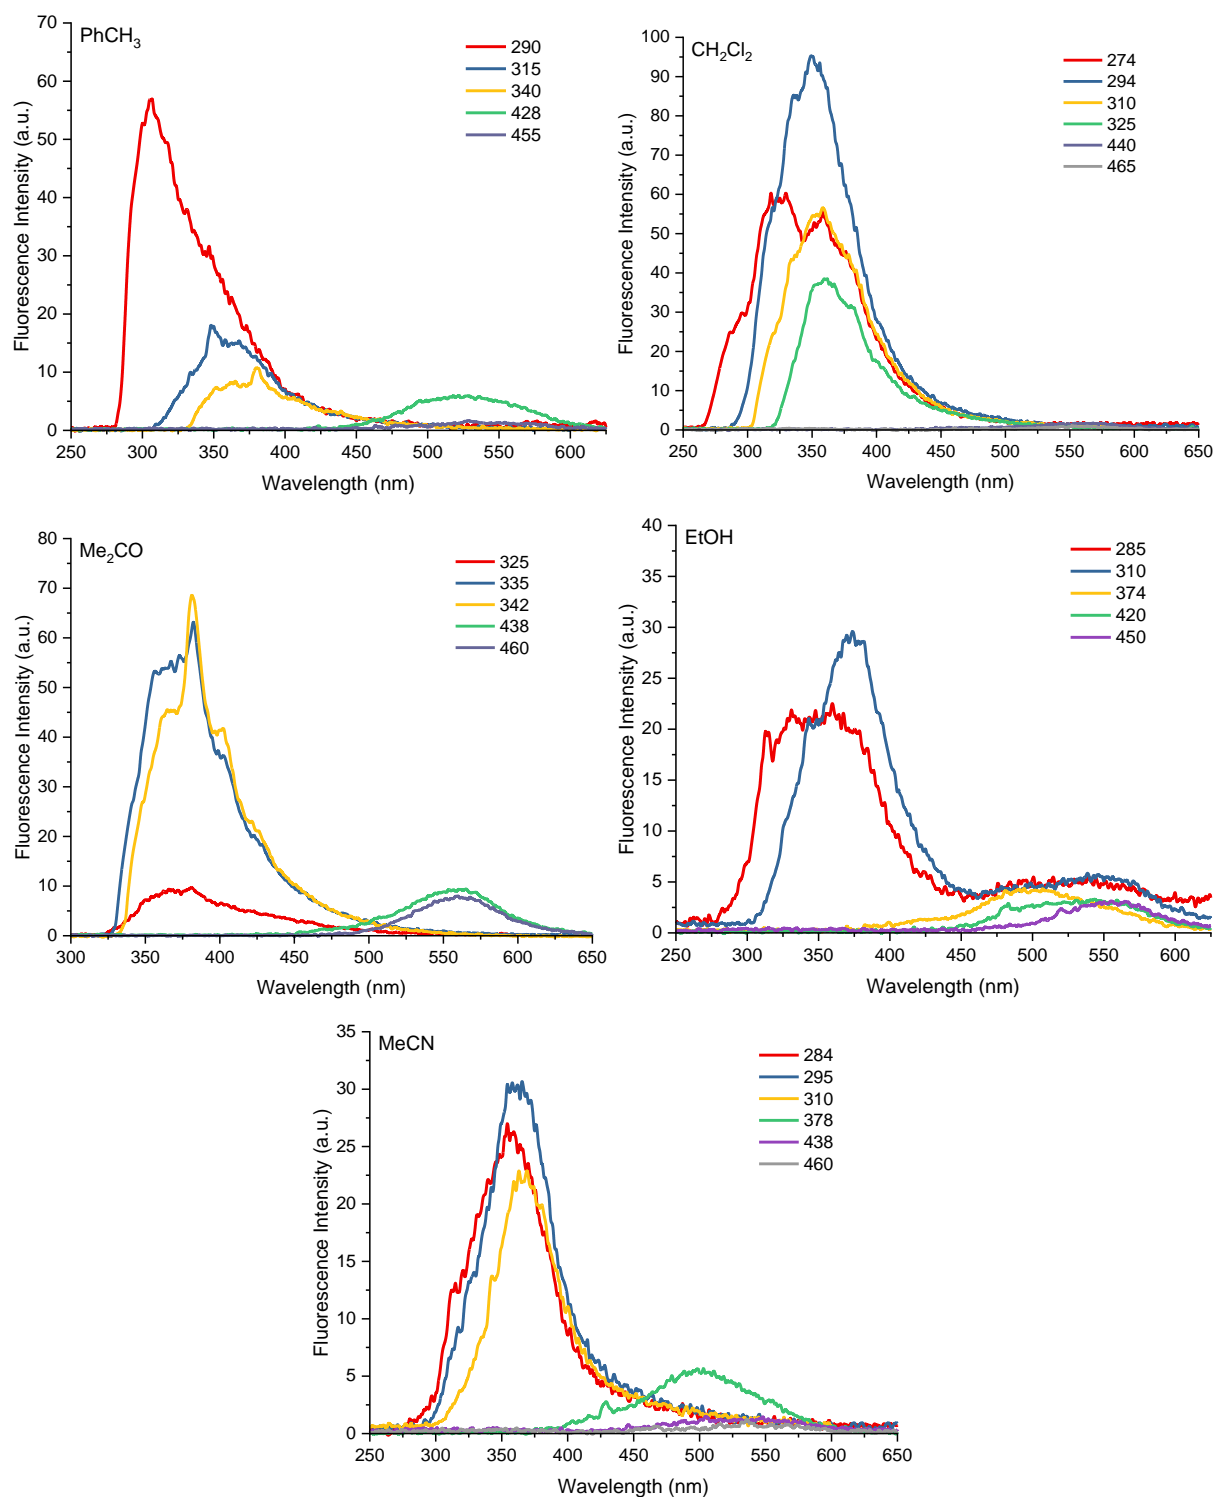

**Figure S6.** Steady-state fluorescence emission spectra of compound **5** in different organic solvents (ca  $10^{-5}$  M, excitation/emission slits: 3.0/3.0 nm) at different excitation wavelengths (nm).

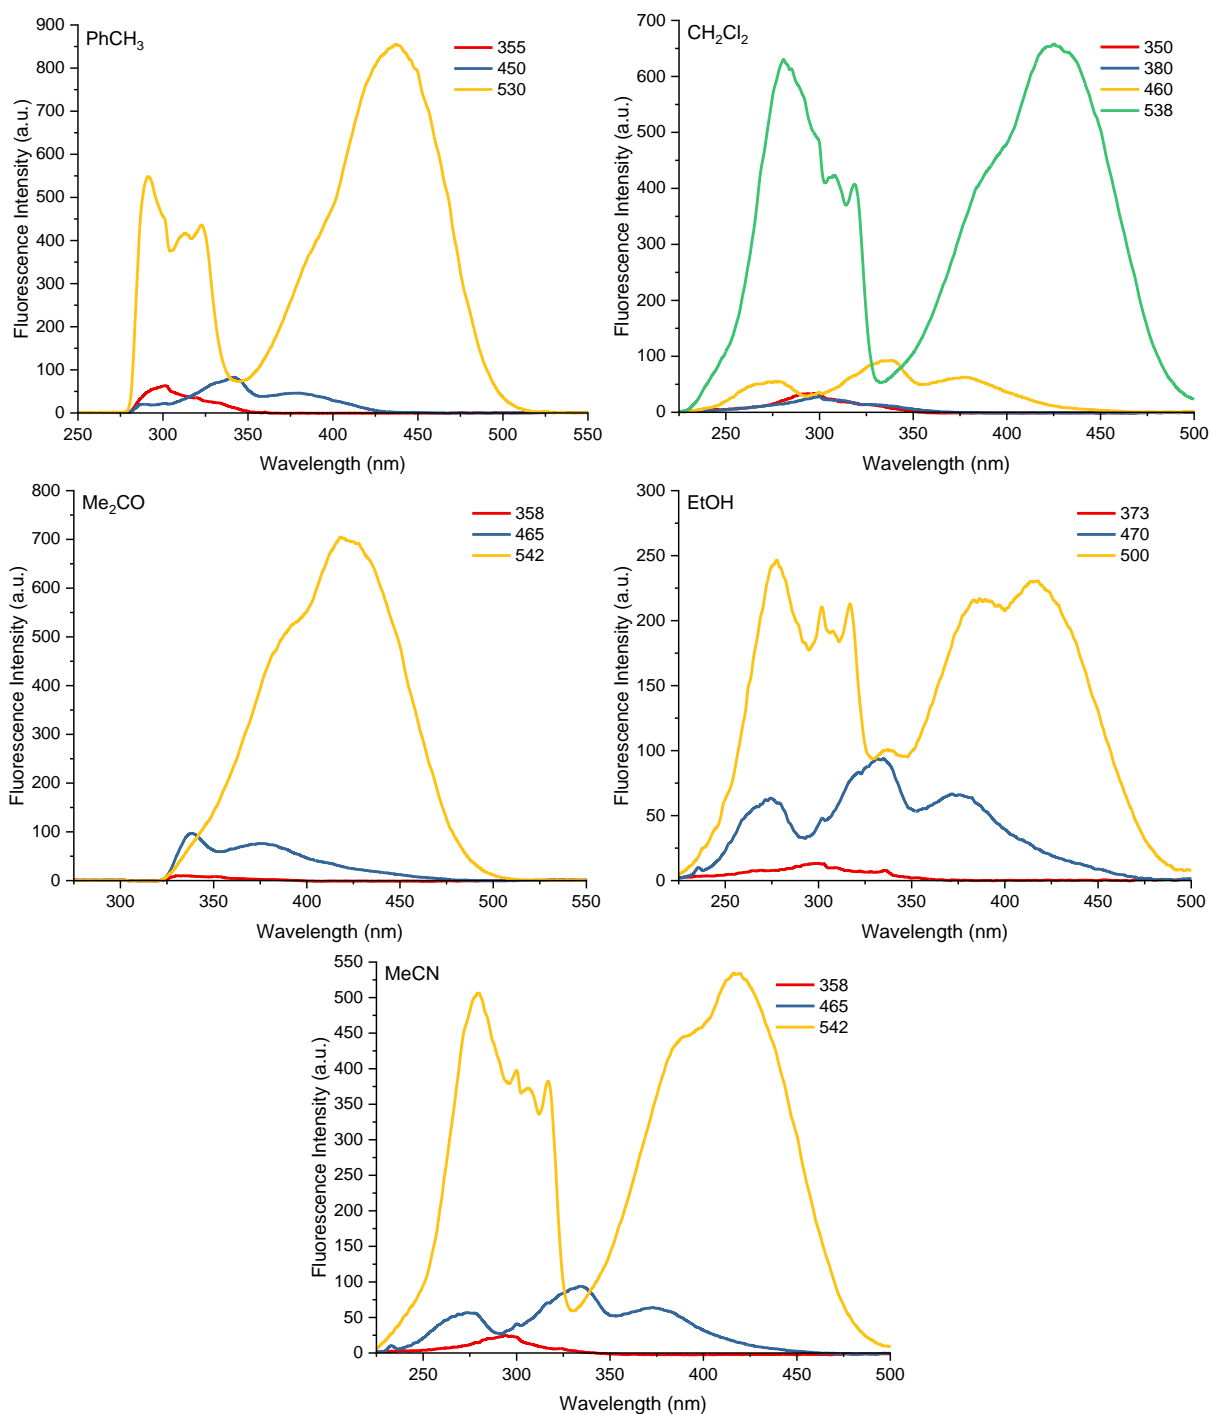

**Figure S7.** Excitation spectra of compound **1** in different organic solvents (ca  $10^{-5}$  M, excitation/emission slits: 3.0/3.0 nm) at different observation wavelengths (nm).

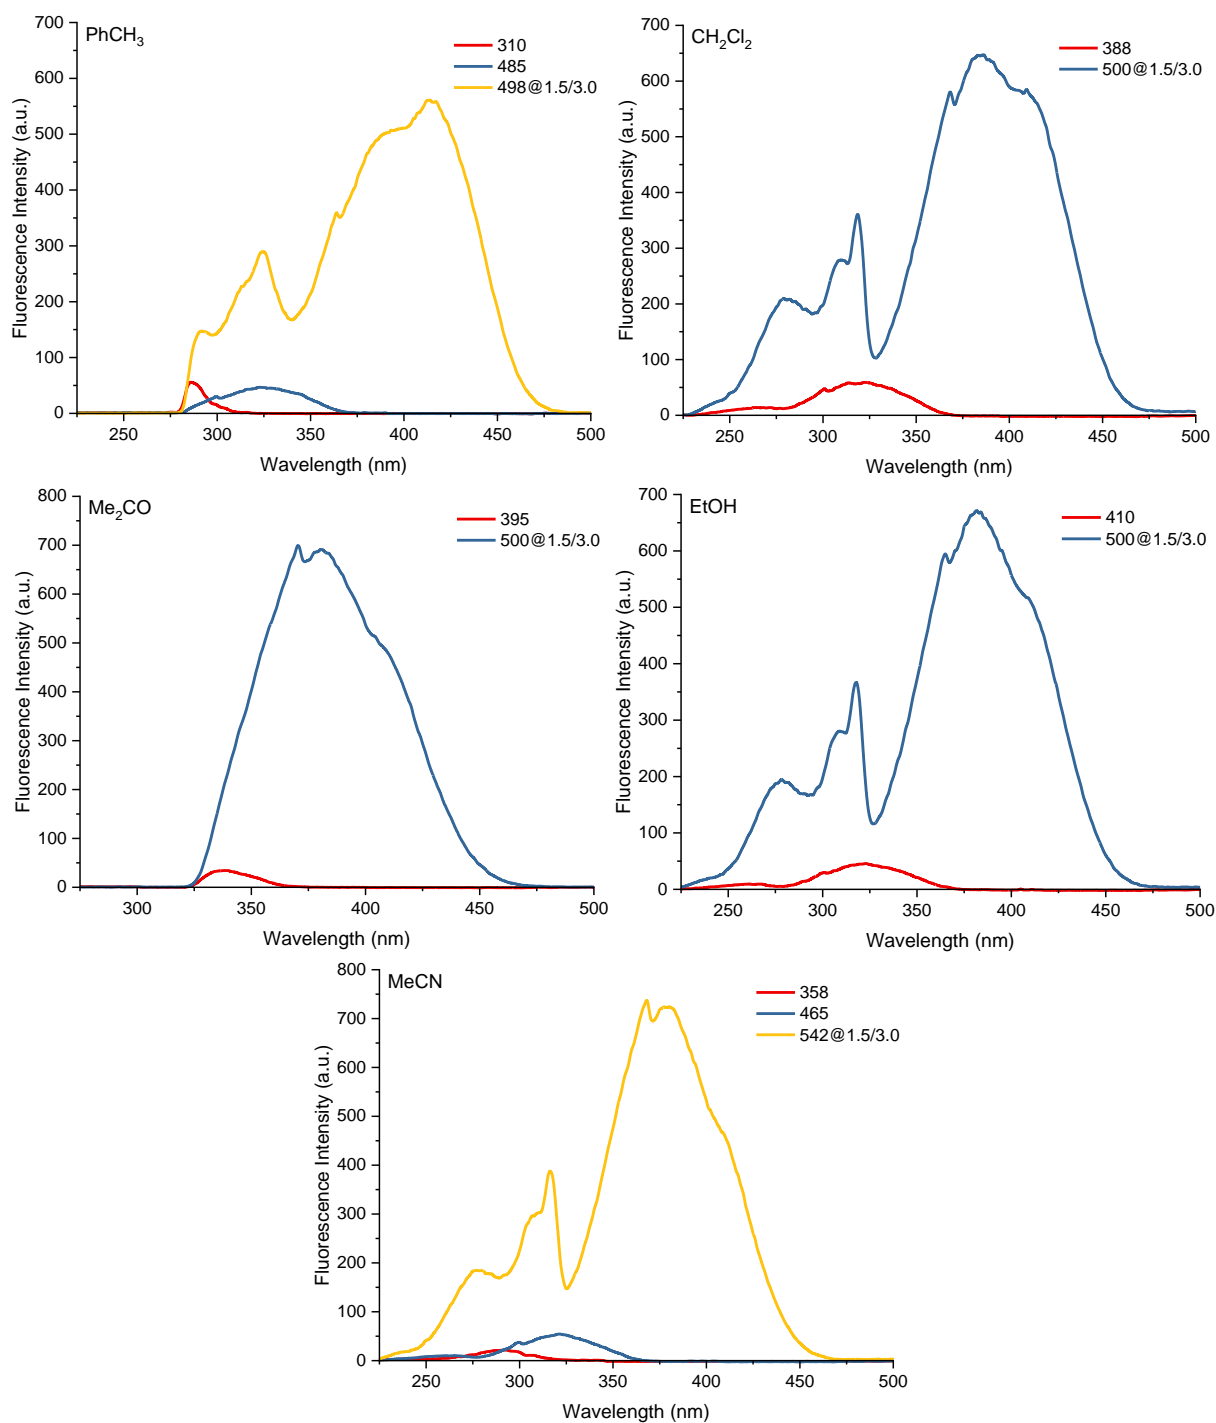

**Figure S8.** Excitation spectra of compound **2** in different organic solvents (ca  $10^{-5}$  M, excitation/emission slits: 3.0/3.0 nm) at different observation wavelengths (nm).

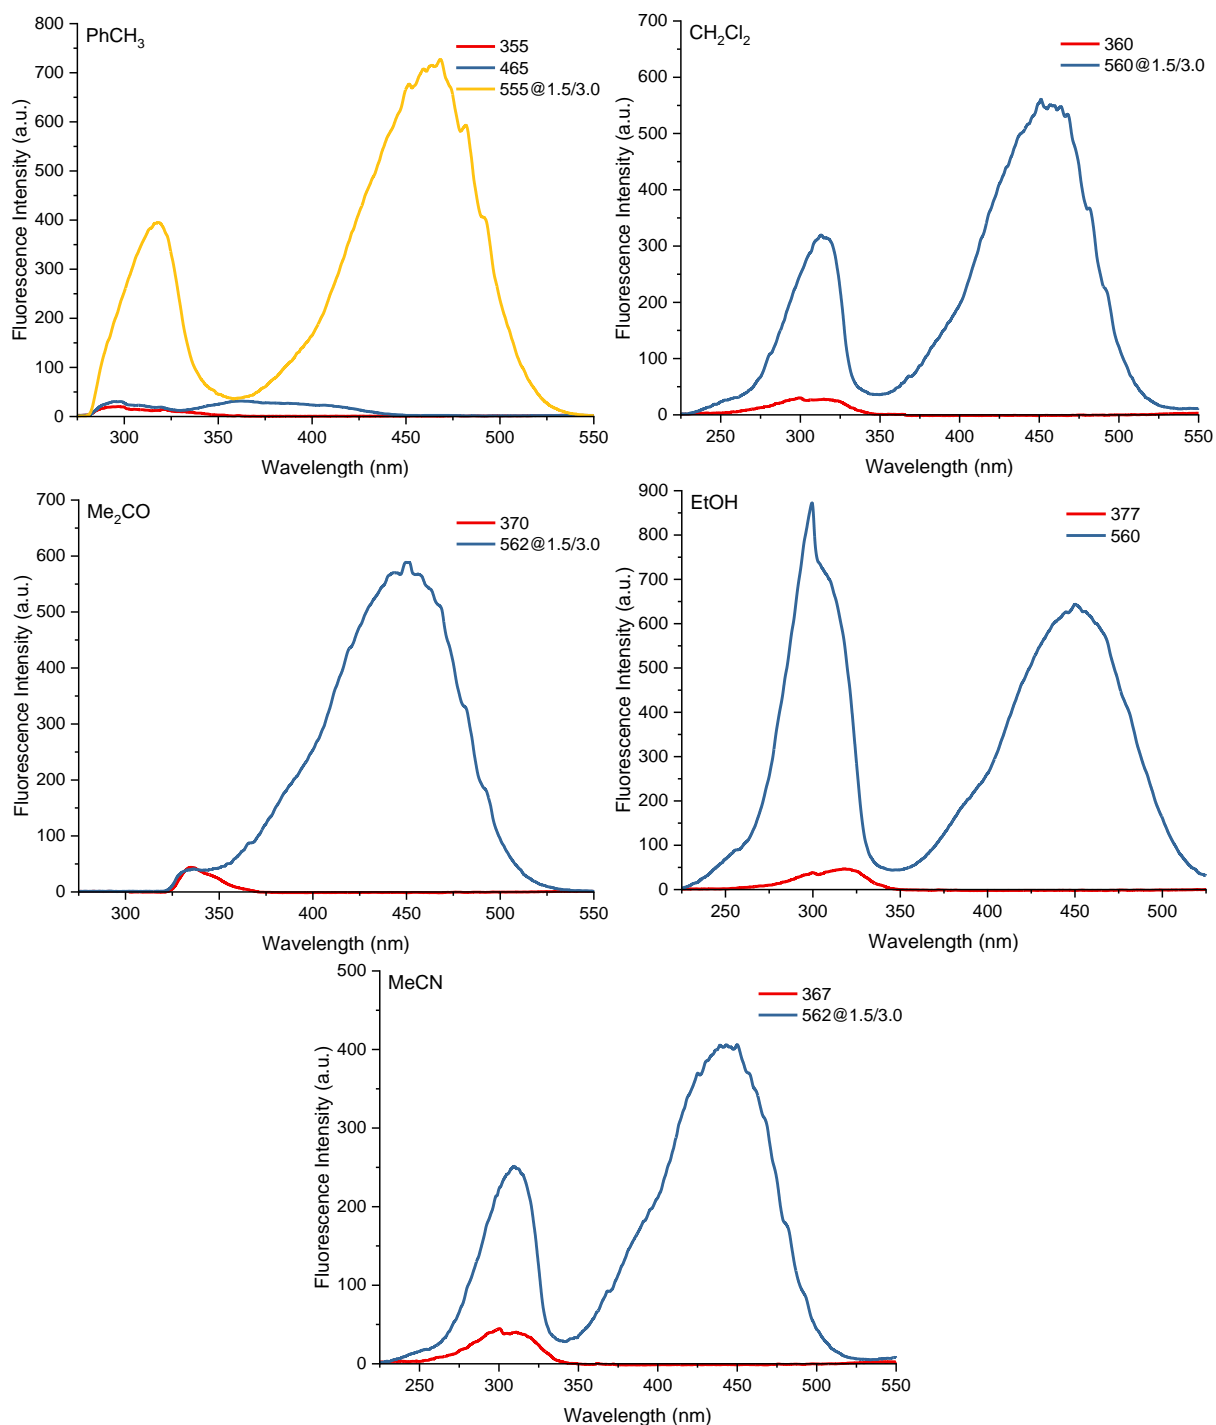

**Figure S9.** Excitation spectra of compound **3** in different organic solvents (ca  $10^{-5}$  M, excitation/emission slits: 3.0/3.0 nm) at different observation wavelengths (nm).

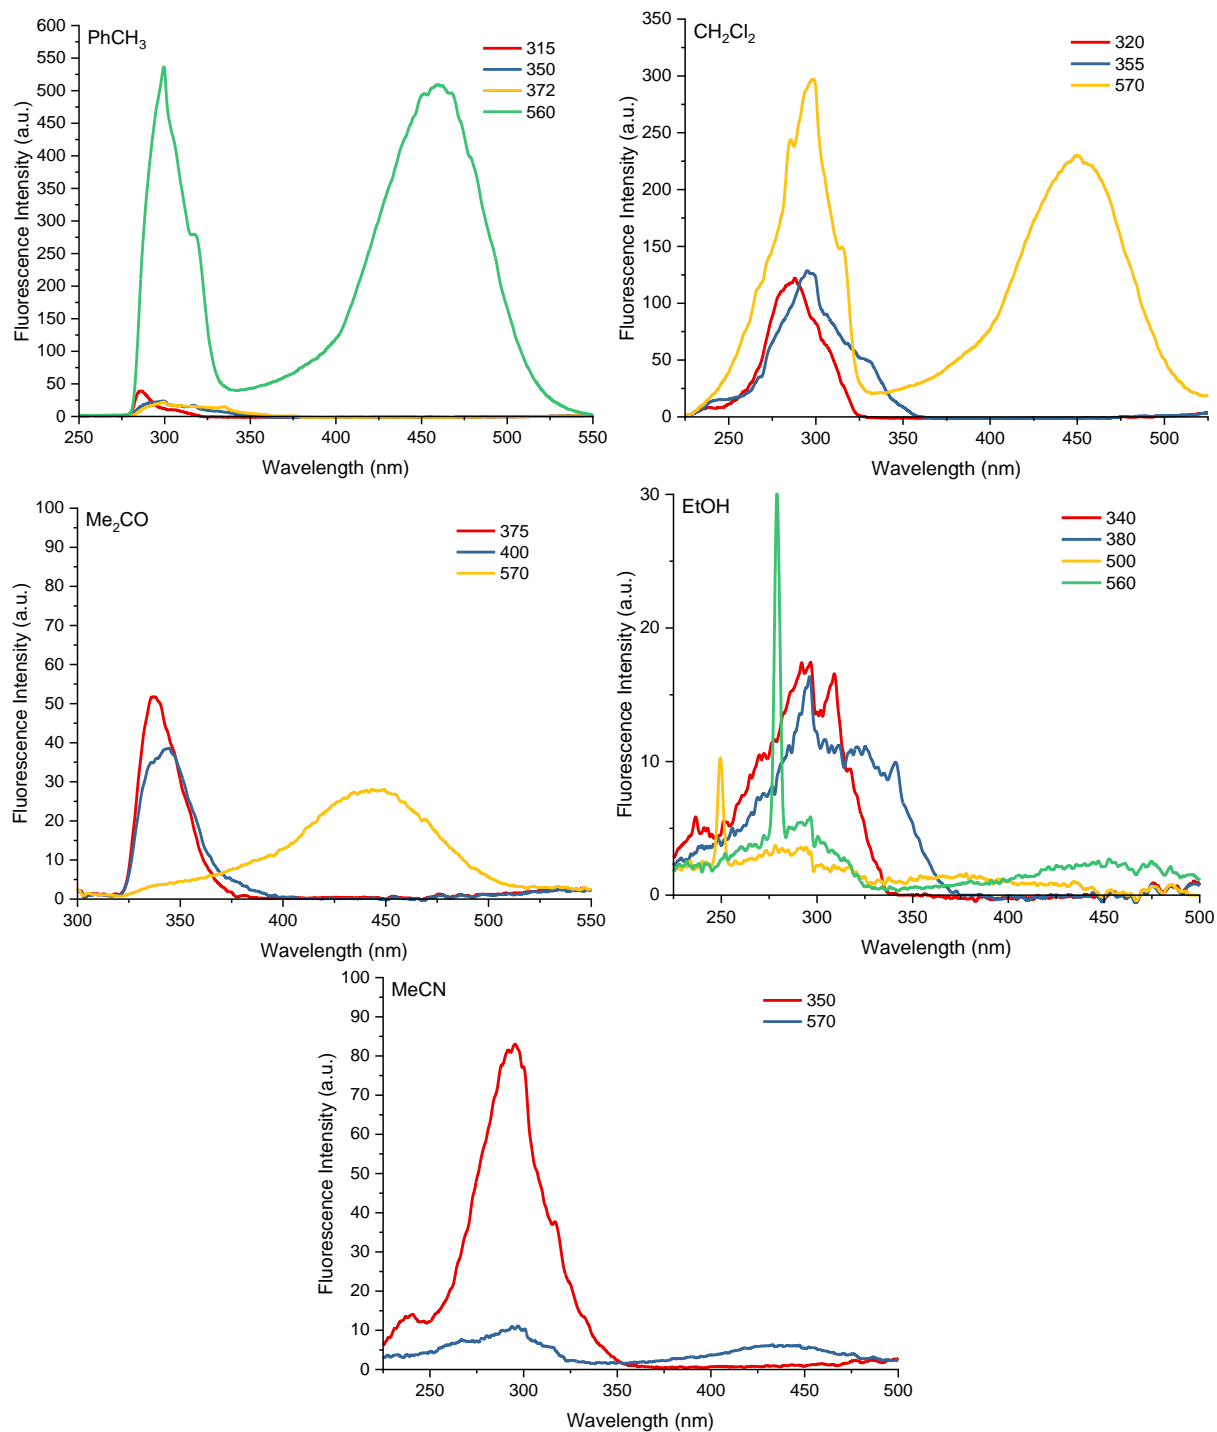

**Figure S10.** Excitation spectra of compound **4** in different organic solvents (ca  $10^{-5}$  M, excitation/emission slits: 3.0/3.0 nm) at different observation wavelengths (nm).

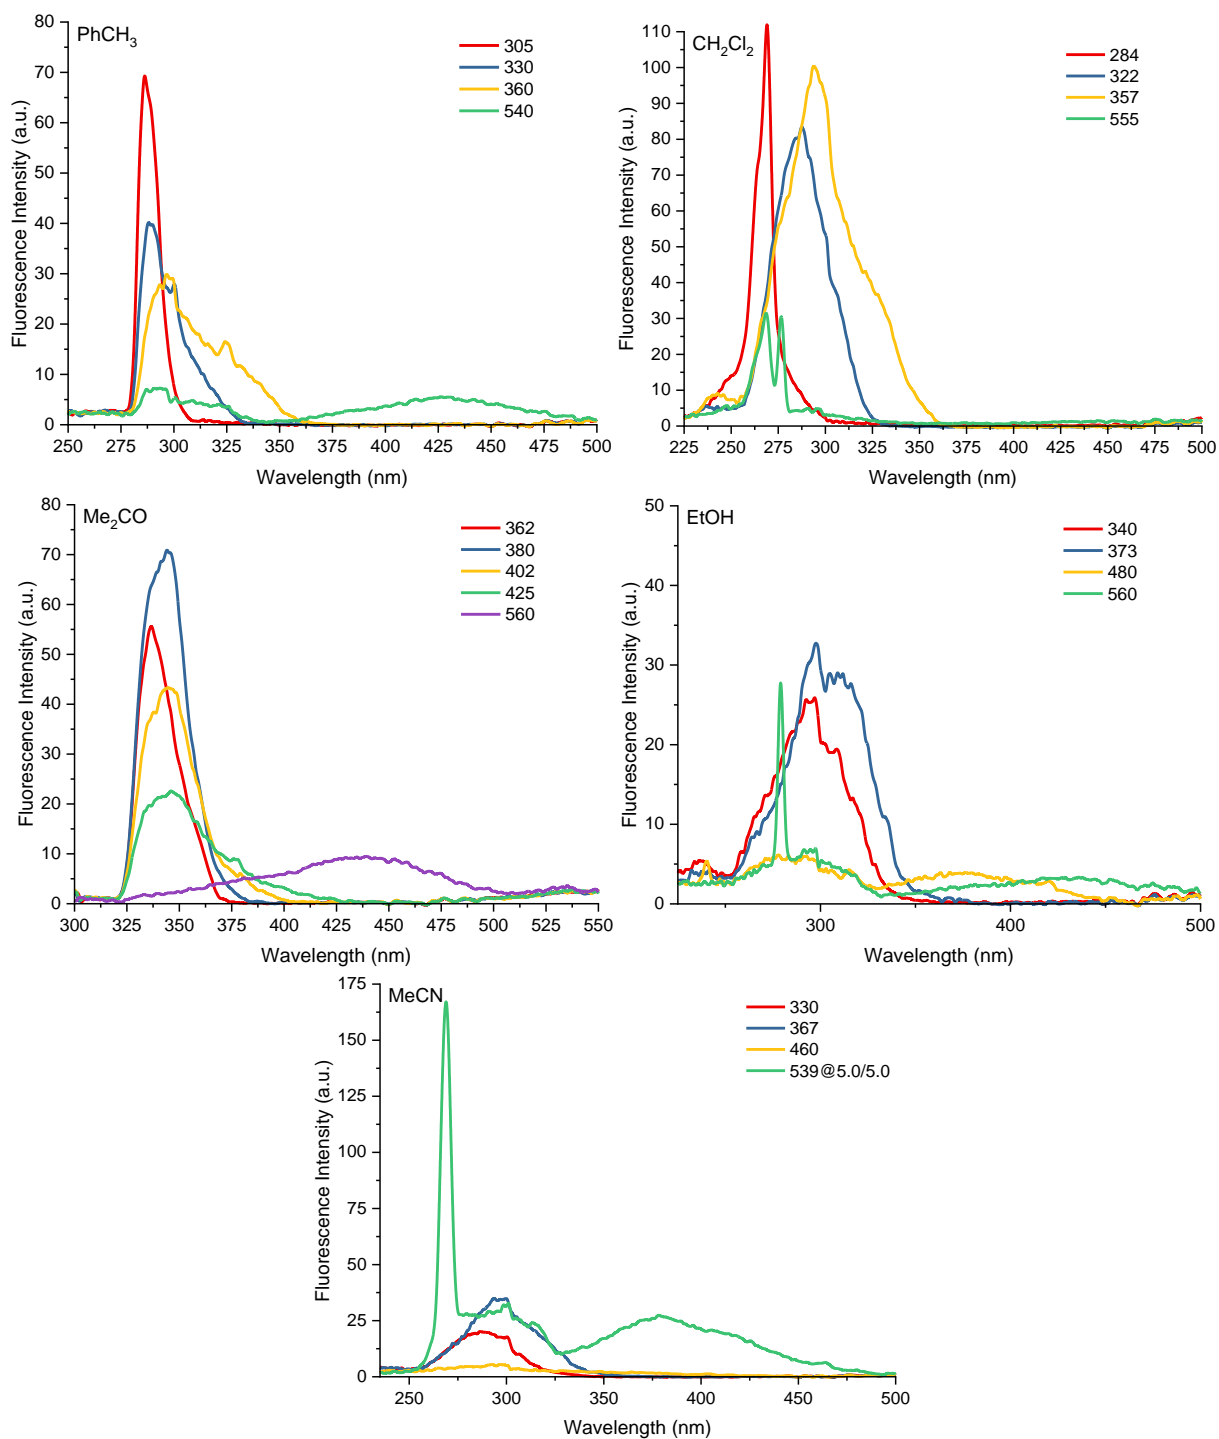

**Figure S11.** Excitation spectra of compound **5** in different organic solvents (ca  $10^{-5}$  M, excitation/emission slits: 3.0/3.0 nm) at different observation wavelengths (nm).

## Study of water influence

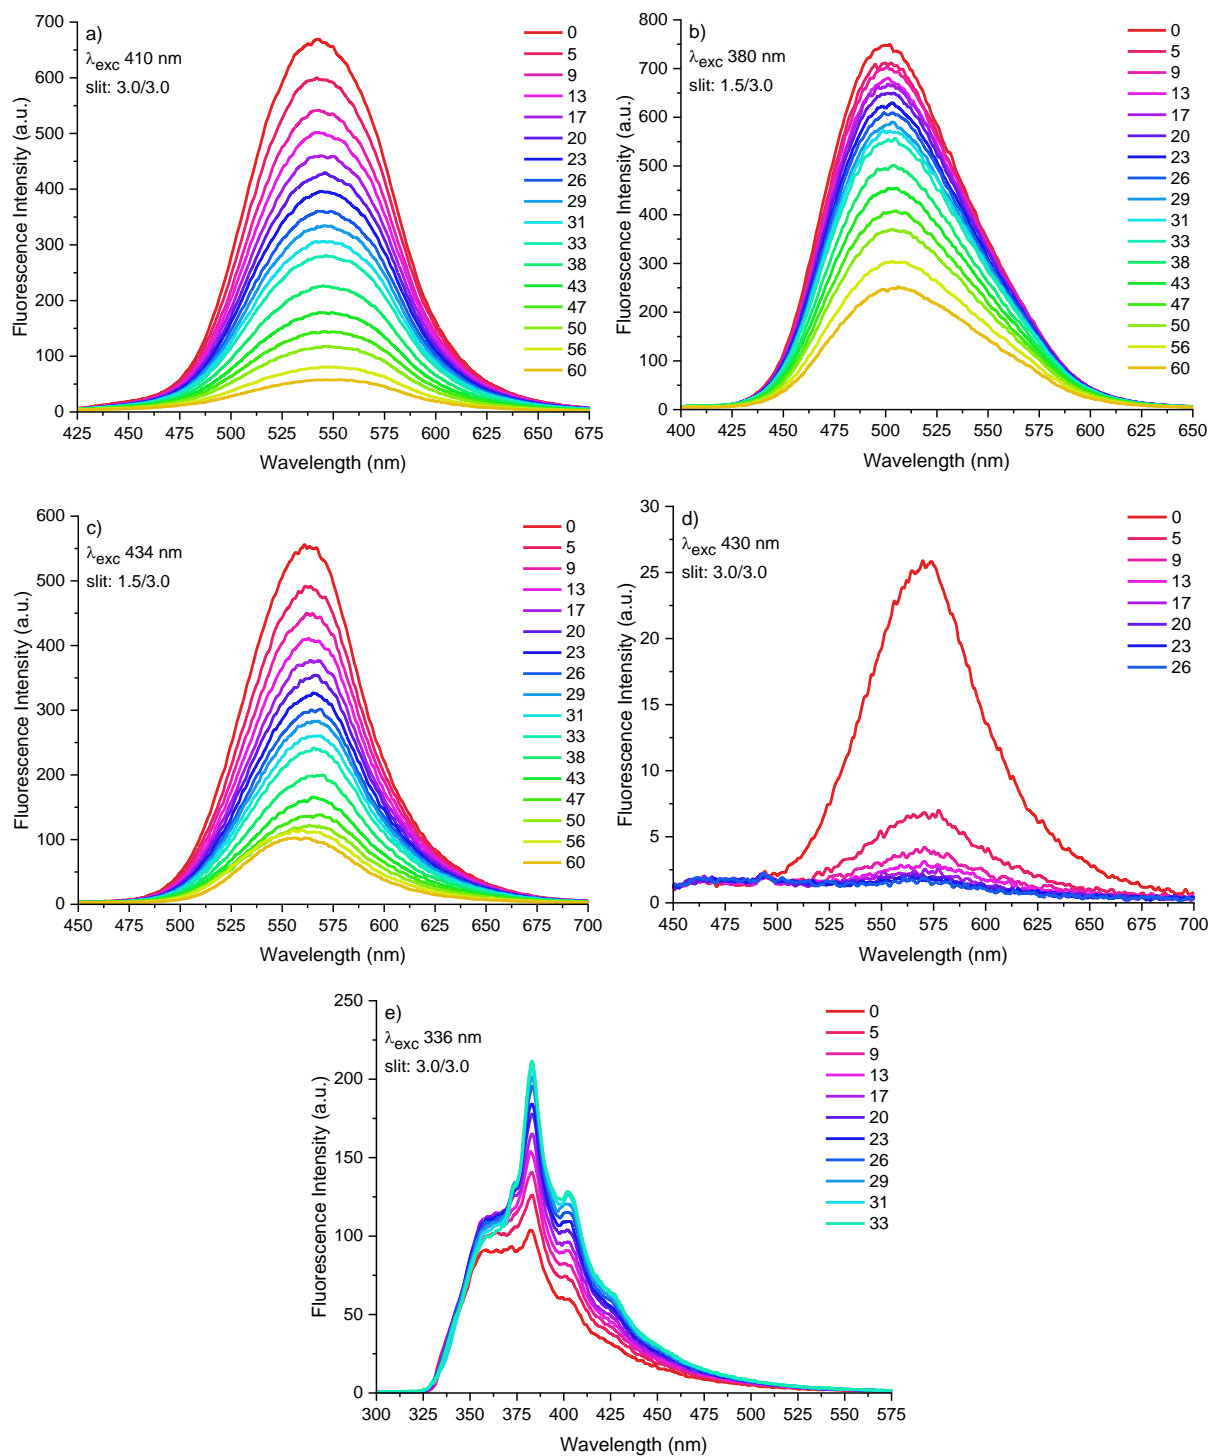

**Figure S12.** Steady-state fluorescence emission spectra in acetone solution of compounds a) 1, b) 2, c) 3, d) 4, and e) 5 (ca  $10^{-5}$  M) upon successive addition of water (% v/v).

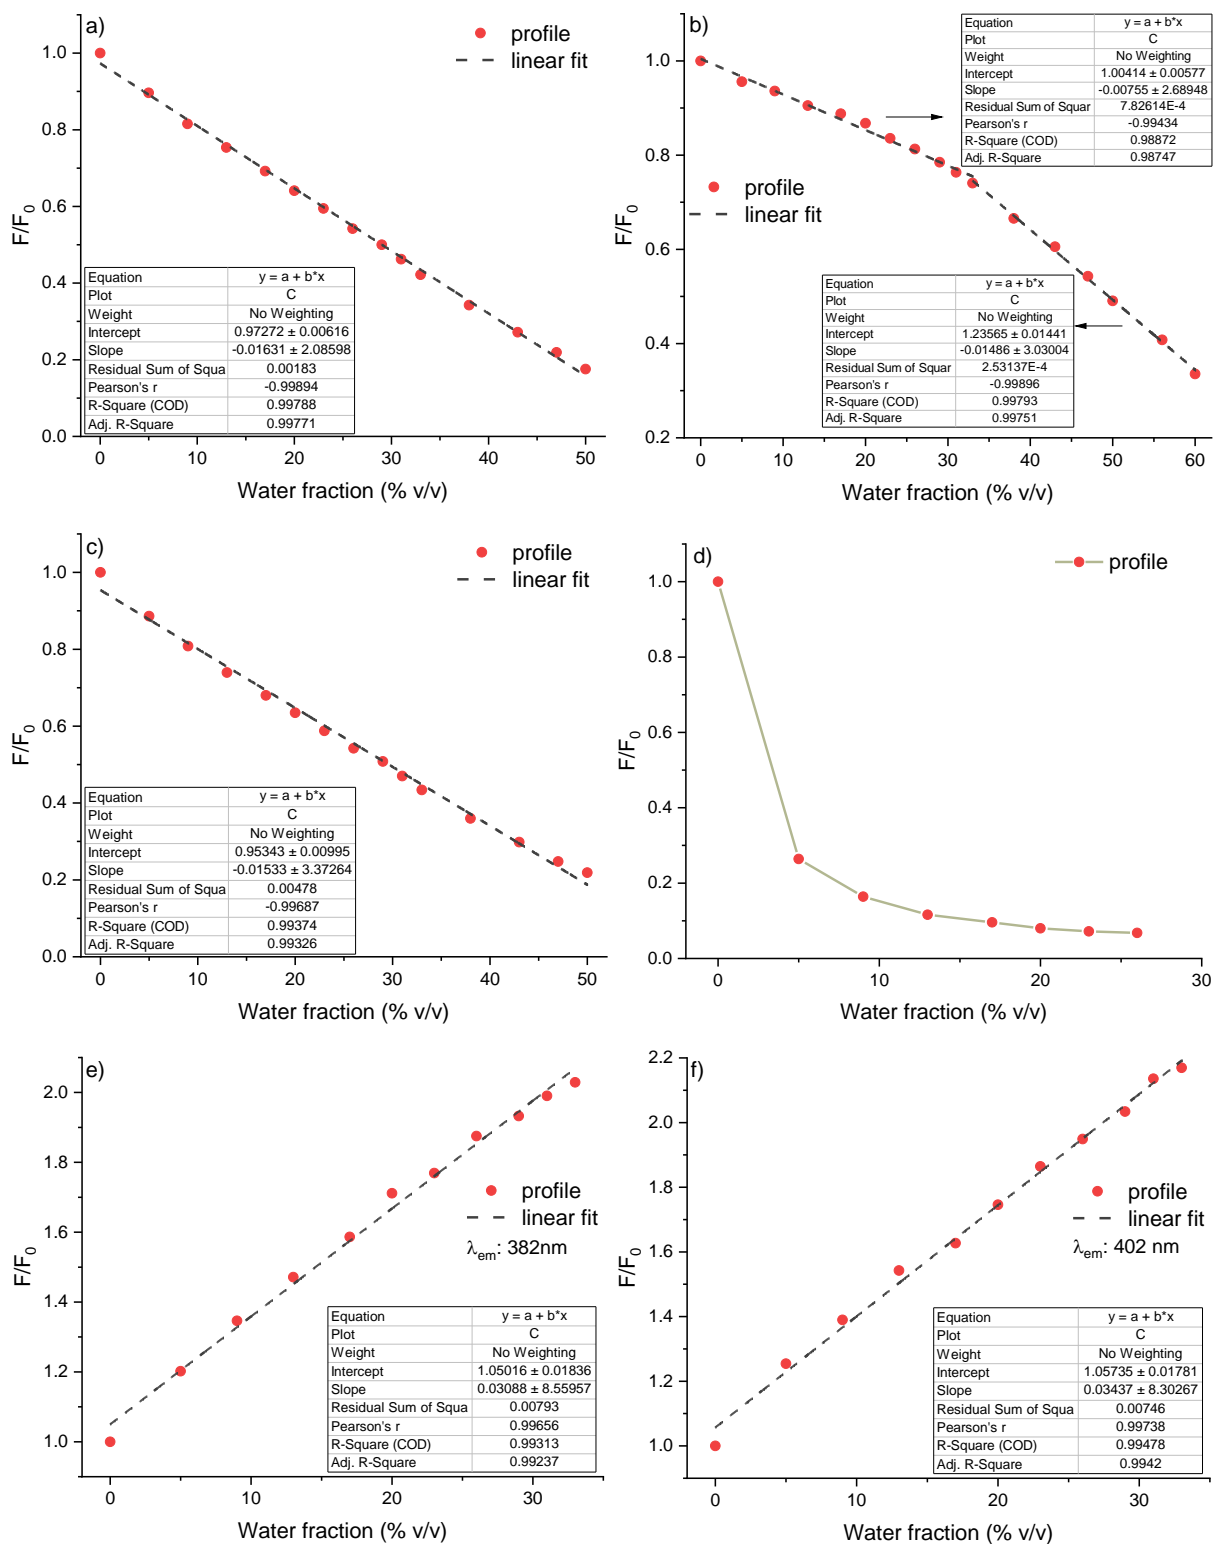

**Figure S13.** Fluorescence emission ratio  $F/F_0$  of compounds a) 1, b) 2, c) 3, d) 4, and e) 5 at  $\lambda_{em}$  382 nm and f) 5 at  $\lambda_{em}$  402 nm in acetone (ca  $10^{-5}$  M) upon successive addition of water (% v/v).



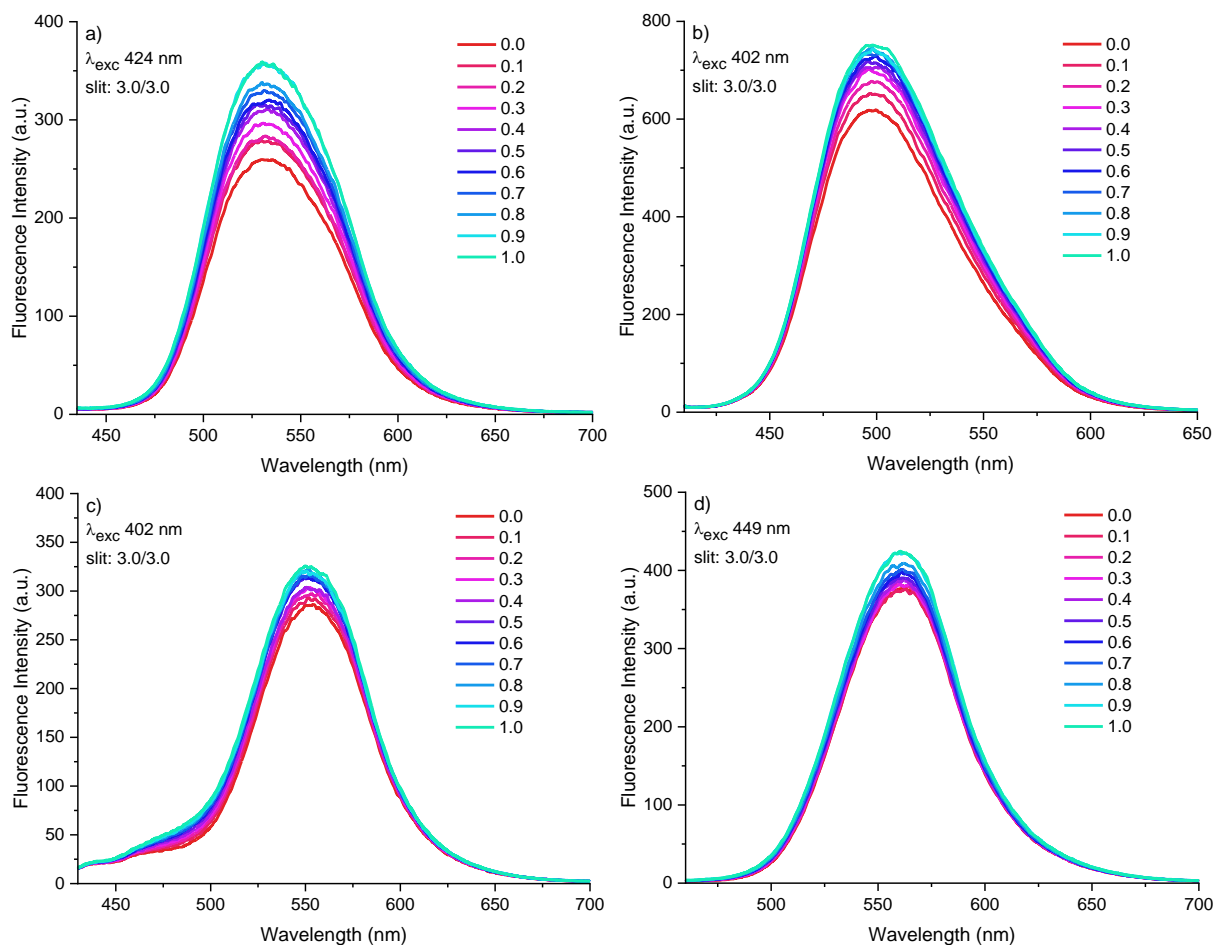

**Figure S14.** Steady-state fluorescence emission spectra in dry toluene solution of compounds a) **1**, b) **2**, c) **3**, and d) **4** (ca  $10^{-5}$  M) upon successive addition of water (% v/v).

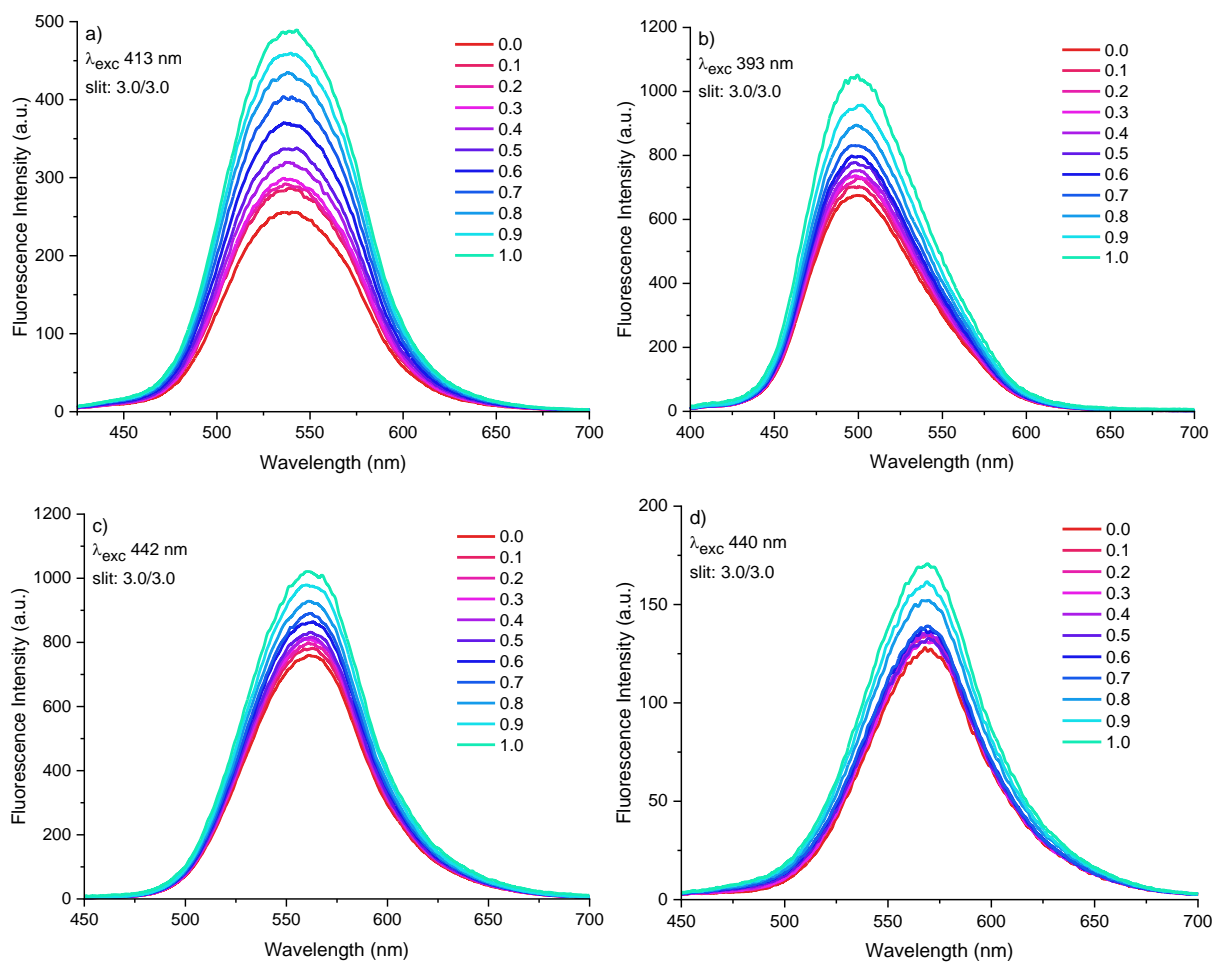

**Figure S15.** Steady-state fluorescence emission spectra in dry dichloromethane solution of compounds a) **1**, b) **2**, c) **3**, and d) **4** (ca  $10^{-5}$  M) upon successive addition of water (% v/v).

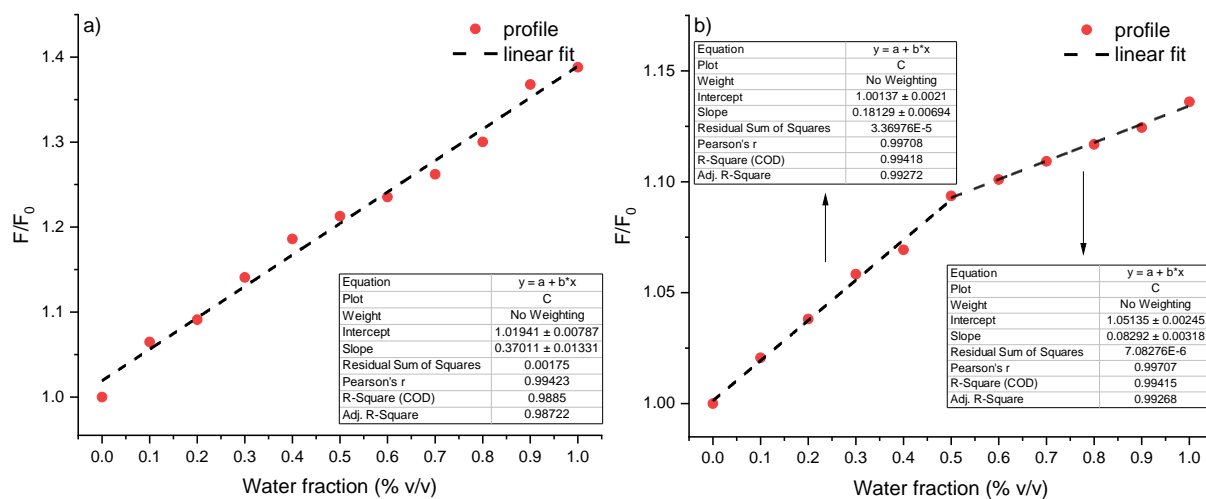

**Figure S16.** Fluorescence emission ratio  $F/F_0$  of compounds a) **1** and b) **3** in dry toluene (ca  $10^{-5}$  M) upon successive addition of water (% v/v).

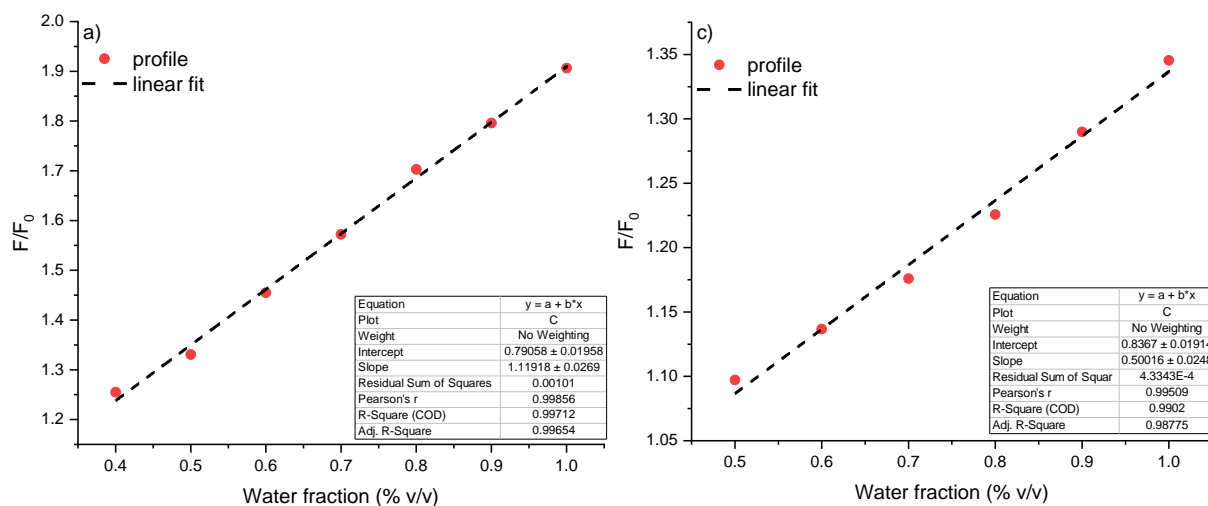

**Figure S17.** Fluorescence emission ratio  $F/F_0$  of compounds a) **1** and b) **3** in dry dichloromethane (ca  $10^{-5}$  M) upon successive addition of water (% v/v).

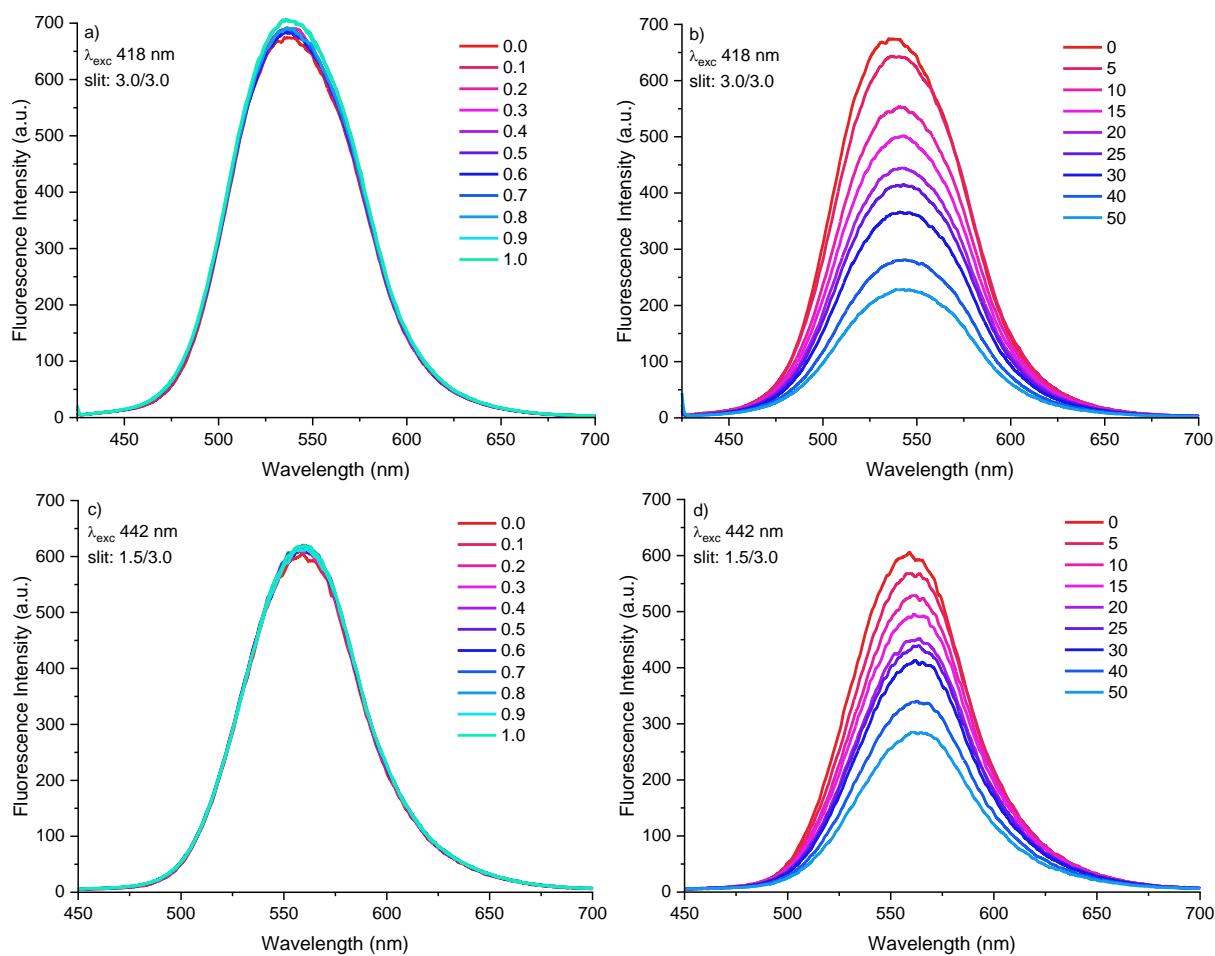

**Figure S18.** Steady-state fluorescence emission spectra in dry THF solution of compounds a) **1** in the range of 0 – 1%, b) **1** in the range of 0 – 50%, c) **3** in the range of 0 – 1%, and d) **3** in the range of 0 – 50% (ca  $10^{-5}$  M) upon successive addition of water (% v/v).

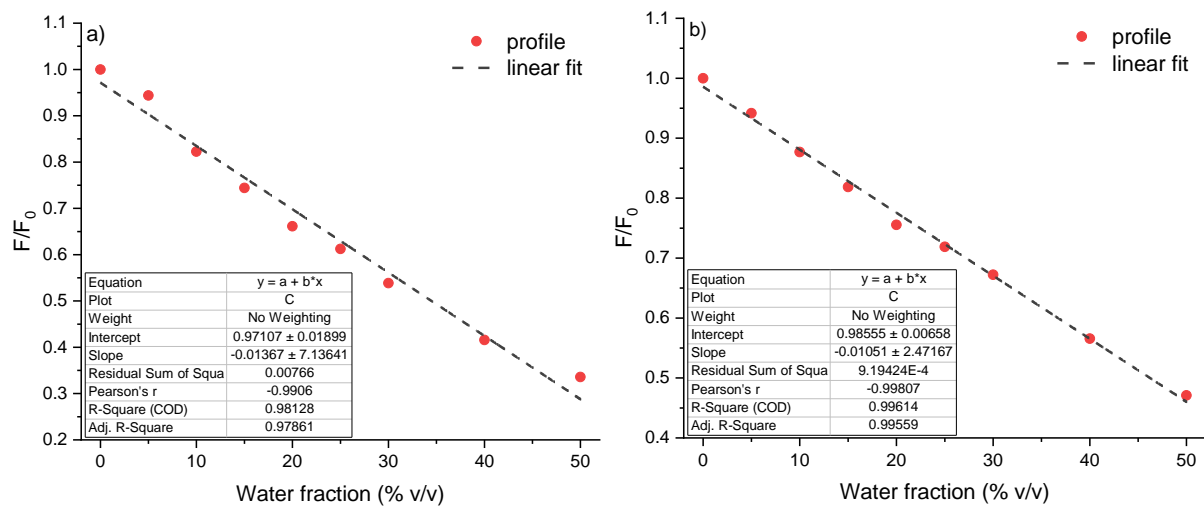

**Figure S19.** Fluorescence emission ratio  $F/F_0$  of compounds a) **1** and b) **3** in dry THF (ca  $10^{-5}$  M) upon successive addition of water (% v/v).

---

# Theoretical Calculations

---

---

**Table S1.** The photophysics data from theoretical predictions where the conditions at vacuum level or solvent simulated by CPCM,  $\lambda_{\text{calc}}$  is the first electronic transition (nm),  $f$  is oscillator strength, Assignment of orbitals concerning the first transition,  $D$  is the dipole moment expressed in Debye,  $\lambda_{\text{exp}}$  is the experimental maximum absorption (nm),  $\Delta E$  is the difference of energy between theoretical and experimental absorption (eV),  $L$  and  $R$  is a side of two substitutions on the benzothiadiazole moiety, and the respective angle between the benzothiadiazole plane (degrees), and the level HOMO and LUMO (eV). For compound **5**, the  $S_1$  and  $T_1$  are the energy of the first level singlet and triplet, and  $\Delta E$  is the difference of energy between the two states.

| Dye | Condition                       | $\lambda_{\text{calc.}}$<br>(nm)              | $f$   | Assignment | Dipole<br>(D) | $\lambda_{\text{exp.}}$<br>(nm) | $\Delta E$<br>(eV)             | L<br>(°) | R<br>(°) | HOMO<br>(eV) | LUMO<br>(eV) |
|-----|---------------------------------|-----------------------------------------------|-------|------------|---------------|---------------------------------|--------------------------------|----------|----------|--------------|--------------|
| 1   | Vacuum                          | 439                                           | 0.25  | H→L 96%    | 2.3           | -                               | -                              | 0.4      | 1.1      | -6.20        | -2.81        |
|     | PhCH <sub>3</sub>               | 429                                           | 0.33  | H→L 97%    | 3.2           | 424                             | -0.03                          | 19.5     | 20.1     | -6.28        | -2.74        |
|     | CH <sub>2</sub> Cl <sub>2</sub> | 414                                           | 0.32  | H→L 97%    | 3.9           | 413                             | -0.01                          | 24.5     | 27.3     | -6.34        | -2.71        |
|     | EtOH                            | 409                                           | 0.32  | H→L 96%    | 4.1           | 405                             | -0.03                          | 26.4     | 28.5     | -6.36        | -2.70        |
|     | Me <sub>2</sub> CO              | 410                                           | 0.32  | H→L 96%    | 4.0           | 411                             | 0.01                           | 26.2     | 28.5     | -6.35        | -2.70        |
|     | MeCN                            | 409                                           | 0.32  | H→L 96%    | 4.1           | 403                             | -0.04                          | 26.7     | 29.0     | -6.36        | -2.70        |
| 2   | Vacuum                          | 412                                           | 0.29  | H→L 97%    | 6.1           | -                               | -                              | -9.8     | 12.1     | -6.85        | -3.28        |
|     | PhCH <sub>3</sub>               | 397                                           | 0.37  | H→L 97%    | 6.7           | 402                             | 0.04                           | -25.0    | 24.5     | -6.79        | -3.04        |
|     | CH <sub>2</sub> Cl <sub>2</sub> | 383                                           | 0.37  | H→L 96%    | 7.3           | 393                             | 0.08                           | -29.2    | 28.7     | -6.75        | -2.90        |
|     | EtOH                            | 379                                           | 0.36  | H→L 96%    | 7.4           | 386                             | 0.06                           | -30.5    | 30.1     | -6.75        | -2.86        |
|     | Me <sub>2</sub> CO              | 380                                           | 0.36  | H→L 96%    | 7.4           | 383                             | 0.03                           | -29.9    | 29.8     | -6.75        | -2.87        |
|     | MeCN                            | 378                                           | 0.36  | H→L 96%    | 7.4           | 379                             | 0.01                           | -30.8    | 30.5     | -6.75        | -2.85        |
| 3   | Vacuum                          | 452                                           | 0.42  | H→L 97%    | 1.5           | -                               | -                              | 45.1     | -1.0     | -6.06        | -2.75        |
|     | PhCH <sub>3</sub>               | 450                                           | 0.52  | H→L 98%    | 2.0           | 451                             | 0.00                           | 46.0     | -2.0     | -6.10        | -2.72        |
|     | CH <sub>2</sub> Cl <sub>2</sub> | 441                                           | 0.52  | H→L 98%    | 2.4           | 442                             | 0.01                           | 46.7     | -2.8     | -6.13        | -2.71        |
|     | EtOH                            | 443                                           | 0.52  | H→L 98%    | 2.3           | 436                             | -0.05                          | 46.8     | -2.8     | -6.14        | -2.71        |
|     | Me <sub>2</sub> CO              | 441                                           | 0.52  | H→L 98%    | 2.4           | 435                             | -0.04                          | 46.8     | -2.8     | -6.13        | -2.71        |
|     | MeCN                            | 441                                           | 0.52  | H→L 98%    | 2.4           | 428                             | -0.08                          | 46.8     | -2.8     | -6.14        | -2.71        |
| 4   | Vacuum                          | 503                                           | 0.18  | H→L 98%    | 0.1           | -                               | -                              | -4.4     | 45.1     | -5.86        | -2.75        |
|     | PhCH <sub>3</sub>               | 492                                           | 0.21  | H→L 99%    | 0.1           | 449                             | -0.24                          | -45.5    | 47.6     | -5.89        | -2.68        |
|     | CH <sub>2</sub> Cl <sub>2</sub> | 478                                           | 0.20  | H→L 99%    | 0.3           | 440                             | -0.22                          | -46.9    | 49.3     | -5.92        | -2.63        |
|     | EtOH                            | 474                                           | 0.20  | H→L 99%    | 0.4           | 438                             | -0.22                          | -47.3    | 49.8     | -5.92        | -2.62        |
|     | Me <sub>2</sub> CO              | 476                                           | 0.20  | H→L 99%    | 0.3           | 431                             | -0.27                          | -46.7    | 49.0     | -5.91        | -2.62        |
|     | MeCN                            | 473                                           | 0.19  | H→L 99%    | 0.4           | 424                             | -0.30                          | -47.4    | 49.9     | -5.93        | -2.62        |
| Dye | Condition                       | $\lambda_{\text{calc.}}$<br>(nm) <sup>a</sup> | $f$   | $S_1$      | $T_1$         | $\lambda_{\text{exp.}}$<br>(nm) | $\Delta E_{\text{st}}$<br>(eV) | L<br>(°) | R<br>(°) | HOMO<br>(eV) | LUMO<br>(eV) |
| 5   | Vacuum                          | 410                                           | 0.001 | 1.824      | 1.814         | -                               | 0.01                           | 81.3     | 80.7     | -5.51        | -2.92        |
|     | PhCH <sub>3</sub>               | 394                                           | 0.002 | 1.950      | 1.940         | 450                             | 0.01                           | 81.3     | 80.8     | -5.55        | -2.83        |
|     | CH <sub>2</sub> Cl <sub>2</sub> | 383                                           | 0.002 | 2.055      | 2.045         | 450                             | 0.01                           | 81.2     | 80.7     | -5.58        | -2.77        |
|     | EtOH                            | 381                                           | 0.002 | 2.035      | 2.025         | 450                             | 0.01                           | 81.2     | 80.7     | -5.58        | -2.76        |
|     | Me <sub>2</sub> CO              | 381                                           | 0.002 | 2.054      | 2.044         | 448                             | 0.01                           | 81.2     | 80.7     | -5.58        | -2.76        |
|     | MeCN                            | 380                                           | 0.002 | 2.059      | 2.049         | 443                             | 0.01                           | 81.1     | 80.7     | -5.59        | -2.76        |

<sup>a</sup> relation to the state 3 transition.
